# Supplementary material for: Exposures and potential health implications of contaminant mixtures in linked source water, finished drinking water, and tapwater from public-supply drinking water systems in Minneapolis/St. Paul area, USA
Source: Royal Society of Chemistry journal article supplement (doi:10.1039/d3ew00066d), 2023-01-01
Supplement: d3ew00066d1.pdf [file d3ew00066d1.pdf]

## Supplemental Information

### Exposures and potential health implications of contaminant mixtures in linked source water, finished drinking water, and tapwater from public-supply drinking water systems in Minneapolis/St. Paul area, USA

Kelly L. Smalling<sup>a\*</sup>, Paul M. Bradley<sup>b</sup>, Kristin M. Romanok<sup>a</sup>, Sarah M. Elliot<sup>c</sup>, Jane de Lambert<sup>d</sup>, Michael J. Focazio<sup>e</sup>, Stephanie E. Gordon<sup>f</sup>, James L. Gray<sup>g</sup>, Leslie K. Kanagy<sup>g</sup>, Michelle L. Hladik<sup>h</sup>, Keith A. Loftin<sup>i</sup>, R. Blaine McCleskey<sup>j</sup>, Elizabeth K. Medlock-Kakaley<sup>k</sup>, Mary C. Cardon<sup>k</sup>, Nicola Evans<sup>k</sup>, Christopher P. Weis<sup>l</sup>

<sup>a</sup> U.S. Geological Survey, Lawrenceville, NJ, USA

<sup>b</sup> U.S. Geological Survey, Columbia, SC, USA

<sup>c</sup> U.S. Geological Survey, Mounds View, MN, USA

<sup>d</sup> Minnesota Department of Health, Saint Paul, MN, USA

<sup>e</sup> U.S. Geological Survey, Reston, VA, USA

<sup>f</sup> U.S. Geological Survey, Kearneysville, WV, USA

<sup>g</sup> U.S. Geological Survey, Lakewood, CO, USA

<sup>h</sup> U.S. Geological Survey, Sacramento, CA, USA

<sup>i</sup> U.S. Geological Survey, Lawrence, KS, USA

<sup>j</sup> U.S. Geological Survey, Boulder, CO, USA

<sup>k</sup> U.S. Environmental Protection Agency, Durham, NC, USA

<sup>l</sup> U.S. National Institute of Environmental Health Sciences/NIH, Bethesda, MD, USA

Corresponding author: Kelly L. Smalling, USGS, New Jersey Water Science Center, Lawrenceville, NJ 08628, ksmall@usgs.gov

The authors declare they have no actual or potential competing financial interests.

Data discussed in this paper are summarized in Supporting Information (Figures S1-3, Tables S1-S12) and in the USGS data release<sup>28</sup> (<https://doi.org/10.5066/P9YQ24QW>).

**Contents: Cover Page, Table of contents, 3 Figures, 12 Tables**

Page 4: Figure S1. Comparison of lead concentrations in source water (blue boxes), finished water (pink boxes) and service-area tapwater (white boxes) using all data including locations where samples were collected from potable and non-potable faucets (left) and potable faucets only (right).

Page 5: Figure S2. Exposure-activity ratios (EAR) and number of samples (right axes) for organic analytes (left axis, in order of decreasing total detections) detected in source water, finished water, and service-area tapwater samples collected from Minnesota, 2019.

Page 6: Figure S3. Toxicity Quotients (TQ) and number of samples (right axes) for organic analytes (left axis, in order of decreasing total detections) detected in source water, finished water, and service-area tapwater samples collected from Minnesota, 2019.

Page 7: Table S1. Site information for samples collected as part of the U.S. Geological Survey (USGS) Ecosystems Mission Area, Environmental Health Infrastructure Project, Minnesota Tapwater Exposure study in, 2019.

Page 9: Table S2. Method information for compounds analyzed for the U.S. Geological Survey (USGS) Ecosystems Mission Area, Environmental Health Infrastructure Project, Minnesota Tapwater Exposure study, 2019.

Page 38: Table S3. Summary data for detected organic compounds, in micrograms per liter, analyzed in source water, finished water, and service-area tapwater samples collected for the U.S. Geological Survey (USGS) Ecosystems Mission Area Environmental Health Infrastructure Project, Minnesota Tapwater Exposure Study, 2019.

Page 40: Table S4. Subset of detected trace element and ion concentrations (in units shown) in source water, finished water, and service-area tapwater samples collected for the U.S. Geological Survey (USGS) Ecosystems Mission Area, Environmental Health Infrastructure Project, Minnesota Tapwater Exposure Study, 2019.

Page 42: Table S5. Quality assurance organic and inorganic analyte results (units listed) laboratory blanks analyzed at the U.S. Geological Survey, Redox Chemistry laboratory, Boulder, Colorado in bottled water samples collected for the USGS Ecosystems Mission Area, Environmental Health Infrastructure Project, Minnesota Tapwater Exposure Study, 2019.

Page 42: Table S6. Quality assurance surrogate recovery or internal dilution standard summary statistics (percent) for the U.S. Geological Survey (USGS) Ecosystems Mission Area, Environmental Health Infrastructure Project, Minnesota Tapwater Exposure Study, 2019.

Page 45: Table S7. Mammalian Bioactivities in ng equivalents per liter (ng L<sup>-1</sup>) of standard steroid hormone (E2, DHT, DEX) analyzed in source water, finished water, and service-area tapwater samples collected in Minnesota, 2019.

Page 46: Table S8. Compound: endpoint combinations excluded from ToxCast evaluation due to unreliable concentration-response relationship and resulting lack of confidence in activity concentration at cutoff (ACC).

Page 48: Table S9. Site-specific Exposure Activity Ratios (EAR) for those compounds with exact Chemical Abstract Service (CAS) number matches and with reliable concentration-response relationship and ACC data in ToxCast, Minnesota Tapwater Exposure Study 2019.

Page 49: Table S10. Site-specific Exposure Activity Ratios (EAR) for all bioassay endpoints within each class shown. Data are for those compounds with exact Chemical Abstract Service (CAS) number matches and with reliable concentration-response relationship and ACC data in ToxCast, Minnesota Tapwater Exposure Study 2019.

Page 50: Table S11. Site specific toxicity quotient(s) (TQ) for human-health benchmarks (lowest concentration available from MCL, MCLG, WHO, AAP, American Academy of Pediatrics, HBSL, or HHBP benchmarks) for each compound shown. TQ is the ratio of the measured concentration to the specific benchmark selected. See Table S12 for benchmark list and links.

Page 51: Table S12. Human-health-based benchmarks in microgram/L ( $\mu\text{g/L}$ ) used to create toxicity quotient results in Table S11.

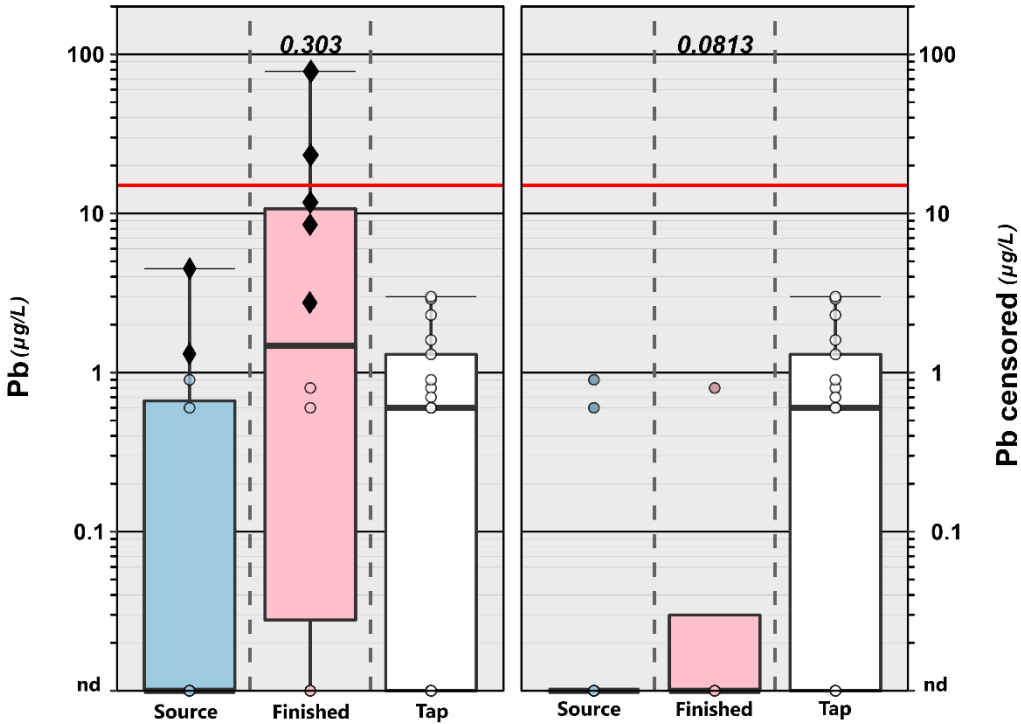

Figure S1. Comparison of lead concentrations in source water (blue boxes), finished water (pink boxes) and service-area tapwater (white boxes) using all data including locations where samples were collected from non-potable faucets (left) and potable faucets only (right). Red line is the non-health-based National Primary Drinking Water Regulation Technology Treatment Action Level. Circles are data for individual samples (both plots) and diamonds (left plot only) are samples collected from non-potable brass faucets and were removed from the analysis. Boxes, centerlines, and whiskers indicate interquartile range, median, and 5th and 95th percentiles, respectively. Numbers above each boxplot pair indicate the permuted probability that the centroids and dispersions are the same (PERMANOVA; 9999 permutations).

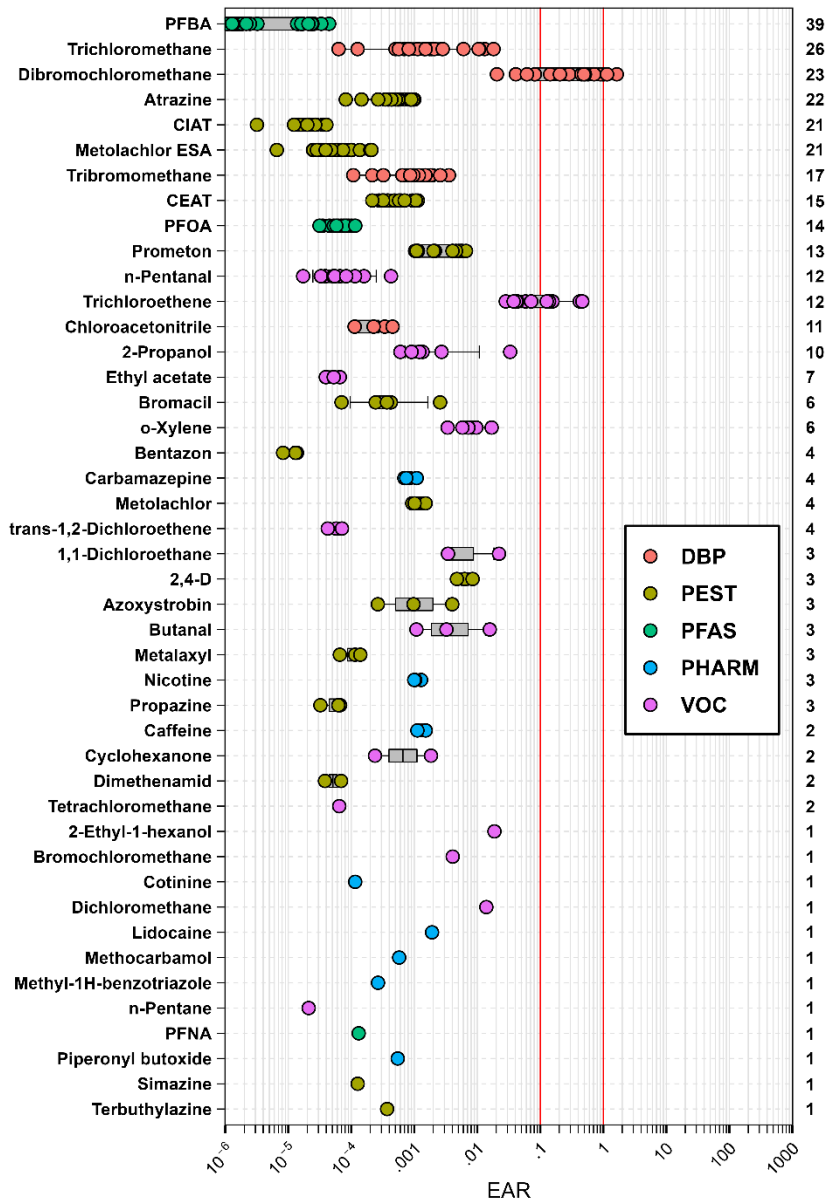

Figure S2. Exposure-activity ratios (EAR) and number of samples (right axes) for organic analytes (left axis, in order of decreasing total detections) detected in source water, finished water and service-area tapwater samples collected from Minnesota, 2019. Circles are data for individual samples. Solid red and yellow lines indicate concentrations shown to modulate effects in vitro and effects-screening-level thresholds (EAR = 0.001), respectively. Boxes, centerlines, and whiskers indicate interquartile range, median, and 5th and 95th percentiles, respectively. [DBP, disinfection byproducts; PEST, pesticides; PFAS, per- and polyfluoroalkyl substances; PHARM, pharmaceuticals; VOC, volatile organic chemicals.]

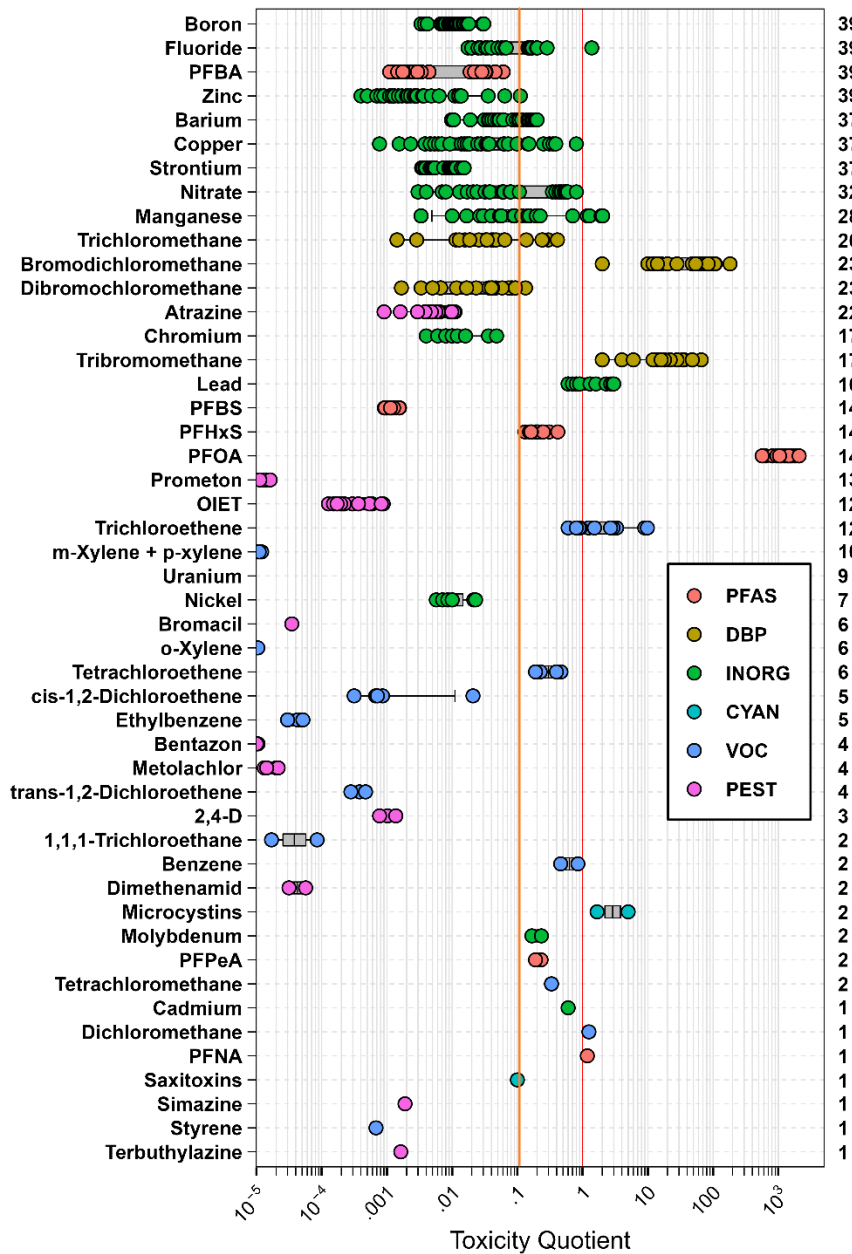

Figure S3. Toxicity Quotients (TQ) and number of samples (right axes) for organic analytes (left axis, in order of decreasing total detections) detected in source water, finished water, and service-area tapwater samples collected from Minnesota, 2019. Circles are data for individual samples. Solid red and yellow lines indicate benchmark equivalent concentrations and effects-screening-level threshold of concern (TQ = 0.1), respectively. Boxes, centerlines, and whiskers indicate interquartile range, median, and 5th and 95th percentiles, respectively. [DBP, disinfection byproducts; INORG, inorganics (ions, trace elements); PEST, pesticides; PFAS, per- and polyfluoroalkyl substances; VOC, volatile organic chemicals.]

Table S1. Site information for samples collected as part of the U.S. Geological Survey (USGS) Ecosystems Mission Area, Environmental Health Infrastructure Project, Minnesota Tapwater Exposure study in, 2019. Quantitation and method detection limits can be found in references cited.

[--; data not available]

| Site code    | Site type      | Sampling date (yyyymmdd) | Sampling time (hhmm) | Source of water | Well depth (feet) |
|--------------|----------------|--------------------------|----------------------|-----------------|-------------------|
| MNTW2019 023 | Source water   | 20190826                 | 1400                 | Surface water   | --                |
| MNTW2019 022 | Finished water | 20190826                 | 1320                 | Surface water   | --                |
| MNTW2019 025 | Tapwater       | 20190826                 | 1430                 | Surface water   | --                |
| MNTW2019 024 | Tapwater       | 20190826                 | 1500                 | Surface water   | --                |
| MNTW2019 010 | Source water   | 20190820                 | 1040                 | Groundwater     | 403               |
| MNTW2019 009 | Finished water | 20190820                 | 1010                 | Groundwater     | 403               |
| MNTW2019 007 | Tapwater       | 20190820                 | 0910                 | Groundwater     | 403               |
| MNTW2019 008 | Tapwater       | 20190820                 | 0940                 | Groundwater     | 403               |
| MNTW2019 027 | Source water   | 20190827                 | 1030                 | Groundwater     | 355               |
| MNTW2019 026 | Finished water | 20190827                 | 1010                 | Groundwater     | 355               |
| MNTW2019 030 | Tapwater       | 20190827                 | 1100                 | Groundwater     | 355               |
| MNTW2019 028 | Source water   | 20190827                 | 0910                 | Groundwater     | 285               |
| MNTW2019 029 | Finished water | 20190827                 | 0930                 | Groundwater     | 285               |
| MNTW2019 031 | Tapwater       | 20190827                 | 1130                 | Groundwater     | 285               |
| MNTW2019 037 | Source water   | 20190828                 | 1000                 | Groundwater     | 157               |
| MNTW2019 036 | Finished water | 20190828                 | 0920                 | Groundwater     | 157               |
| MNTW2019 038 | Tapwater       | 20190828                 | 1030                 | Groundwater     | 157               |
| MNTW2019 039 | Tapwater       | 20190828                 | 1110                 | Groundwater     | 157               |
| MNTW2019 011 | Source water   | 20190820                 | 1310                 | Surface water   | --                |
| MNTW2019 012 | Finished water | 20190820                 | 1340                 | Surface water   | --                |
| MNTW2019 013 | Tapwater       | 20190820                 | 1440                 | Surface water   | --                |
| MNTW2019 014 | Tapwater       | 20190820                 | 1530                 | Surface water   | --                |
| MNTW2019 020 | Source water   | 20190826                 | 1100                 | Groundwater     | 290               |
| MNTW2019 019 | Finished water | 20190826                 | 1030                 | Groundwater     | 290               |
| MNTW2019 006 | Tapwater       | 20190826                 | 1150                 | Groundwater     | 222               |
| MNTW2019 018 | Source water   | 20190826                 | 0950                 | Groundwater     | 222               |
| MNTW2019 017 | Finished water | 20190826                 | 0920                 | Groundwater     | 222               |
| MNTW2019 021 | Tapwater       | 20190826                 | 1220                 | Groundwater     | 222               |
| MNTW2019 002 | Source water   | 20190819                 | 1320                 | Groundwater     | 342               |
| MNTW2019 005 | Tapwater       | 20190819                 | 1420                 | Groundwater     | 342               |
| MNTW2019 004 | Source water   | 20190819                 | 1120                 | Surface water   | --                |
| MNTW2019 003 | Finished water | 20190819                 | 1010                 | Surface water   | --                |
| MNTW2019 001 | Tapwater       | 20190819                 | 0920                 | Surface water   | --                |

|              |                |          |      |             |     |
|--------------|----------------|----------|------|-------------|-----|
| MNTW2019 016 | Source water   | 20190821 | 0930 | Groundwater | 152 |
| MNTW2019 015 | Tapwater       | 20190821 | 0900 | Groundwater | 152 |
| MNTW2019 033 | Source water   | 20190827 | 1310 | Groundwater | 460 |
| MNTW2019 032 | Finished water | 20190827 | 1250 | Groundwater | 460 |
| MNTW2019 034 | Tapwater       | 20190827 | 1340 | Groundwater | 460 |
| MNTW2019 035 | Tapwater       | 20190827 | 1410 | Groundwater | 460 |



Table S2. Method information for compounds analyzed for the U.S. Geological Survey (USGS) Ecosystems Mission Area, Environmental Health Infrastructure Project, Minnesota Tapwater Exposure study, 2019.

[CAS, Chemical Abstract Services; y, year; RL, reporting limit; NA, not available; EPA, U.S. Environmental Protection Agency; RED01, enzyme reduction-diazotization; AAS, auto hydride; GC, gas chromatograph; LC, liquid chromatography; ICP-MS, inductively coupled plasma- mass spectrometry; cICP-MS, cell inductively coupled plasma-mass spectrometry; HPLC/MS-MS, high performance liquid chromatography-tandem mass spectrometry; HCO<sub>3</sub>, bicarbonate;  $\mu$ S/cm, microsiemens per centimeter; ug/l, micrograms per liter; mg/L, milligrams per liter; ng/L, nanograms per liter; DAI-LC/MS-MS, direct aqueous injection-liquid chromatography/tandem mass spectrometry; ICP-OES, inductively coupled plasma-optical emission spectrometry; IC, ion chromatography; GCM66, ambient purgeable method (GC/MS); GM016, heat purgeable method (GC/MS); GC/MS-MS, gas chromatography, tandem mass spectrometry; LC/MS-MS, liquid chromatography-tandem mass spectrometry; ELISA, enzyme linked immunosorbent assay for algal toxins]

| Parameter Name                    | Common/primary use/group | Analyzing laboratory | Method   | CAS number  | Reporting limit | Units of measurement | Method citation          |
|-----------------------------------|--------------------------|----------------------|----------|-------------|-----------------|----------------------|--------------------------|
| 1,7-Dimethylxanthine (p-Xanthine) | Pharmaceutical           | NWQL                 | LC/MS-MS | 611-59-6    | 88              | ng/L                 | Furlong and others, 2014 |
| 10-Hydroxy-amitriptyline          | Pharmaceutical           | NWQL                 | LC/MS-MS | 64520-05-4  | 8.3             | ng/L                 | Furlong and others, 2014 |
| Abacavir                          | Pharmaceutical           | NWQL                 | LC/MS-MS | 136470-78-5 | 2               | ng/L                 | Furlong and others, 2014 |
| Acetaminophen                     | Pharmaceutical           | NWQL                 | LC/MS-MS | 103-90-2    | 20              | ng/L                 | Furlong and others, 2014 |
| Acyclovir                         | Pharmaceutical           | NWQL                 | LC/MS-MS | 59277-89-3  | 22              | ng/L                 | Furlong and others, 2014 |
| Albuterol                         | Pharmaceutical           | NWQL                 | LC/MS-MS | 18559-94-9  | 6.7             | ng/L                 | Furlong and others, 2014 |
| Alprazolam                        | Pharmaceutical           | NWQL                 | LC/MS-MS | 28981-97-7  | 21              | ng/L                 | Furlong and others, 2014 |
| Amitriptyline                     | Pharmaceutical           | NWQL                 | LC/MS-MS | 50-48-6     | 37              | ng/L                 | Furlong and others, 2014 |
| Amphetamine                       | Pharmaceutical           | NWQL                 | LC/MS-MS | 300-62-9    | 4.4             | ng/L                 | Furlong and others, 2014 |
| Antipyrine                        | Pharmaceutical           | NWQL                 | LC/MS-MS | 60-80-0     | 50              | ng/L                 | Furlong and others, 2014 |
| Atenolol                          | Pharmaceutical           | NWQL                 | LC/MS-MS | 29122-68-7  | 13              | ng/L                 | Furlong and others, 2014 |
| Atrazine                          | Pesticide                | NWQL                 | LC/MS-MS | 1912-24-9   | 20              | ng/L                 | Furlong and others, 2014 |
| Benzotropine                      | Pharmaceutical           | NWQL                 | LC/MS-MS | 86-13-5     | 44              | ng/L                 | Furlong and others, 2014 |

| Parameter Name     | Common/primary use/group | Analyzing laboratory | Method   | CAS number | Reporting limit | Units of measurement | Method citation          |
|--------------------|--------------------------|----------------------|----------|------------|-----------------|----------------------|--------------------------|
| Betamethasone      | Pharmaceutical           | NWQL                 | LC/MS-MS | 378-44-9   | 114             | ng/L                 | Furlong and others, 2014 |
| Bupropion          | Pharmaceutical           | NWQL                 | LC/MS-MS | 34911-55-2 | 18              | ng/L                 | Furlong and others, 2014 |
| Caffeine           | Pharmaceutical           | NWQL                 | LC/MS-MS | 58-08-2    | 91              | ng/L                 | Furlong and others, 2014 |
| Carbamazepine      | Pharmaceutical           | NWQL                 | LC/MS-MS | 298-46-4   | 11              | ng/L                 | Furlong and others, 2014 |
| Carisoprodol       | Pharmaceutical           | NWQL                 | LC/MS-MS | 78-44-4    | 20              | ng/L                 | Furlong and others, 2014 |
| Chlorpheniramine   | Pharmaceutical           | NWQL                 | LC/MS-MS | 132-22-9   | 54              | ng/L                 | Furlong and others, 2014 |
| Cimetidine         | Pharmaceutical           | NWQL                 | LC/MS-MS | 51481-61-9 | 140             | ng/L                 | Furlong and others, 2014 |
| Citalopram         | Pharmaceutical           | NWQL                 | LC/MS-MS | 59729-33-8 | 6.6             | ng/L                 | Furlong and others, 2014 |
| Clonidine          | Pharmaceutical           | NWQL                 | LC/MS-MS | 4205-90-7  | 61              | ng/L                 | Furlong and others, 2014 |
| Codeine            | Pharmaceutical           | NWQL                 | LC/MS-MS | 76-57-3    | 32              | ng/L                 | Furlong and others, 2014 |
| Cotinine           | Pharmaceutical           | NWQL                 | LC/MS-MS | 486-56-6   | 6.4             | ng/L                 | Furlong and others, 2014 |
| Dehydronifedipine  | Pharmaceutical           | NWQL                 | LC/MS-MS | 67035-22-7 | 20              | ng/L                 | Furlong and others, 2014 |
| Desmethyldiltiazem | Pharmaceutical           | NWQL                 | LC/MS-MS | -          | 70              | ng/L                 | Furlong and others, 2014 |
| Desvenlafaxine     | Pharmaceutical           | NWQL                 | LC/MS-MS | 93413-62-8 | 84              | ng/L                 | Furlong and others, 2014 |
| Dextromethorphan   | Pharmaceutical           | NWQL                 | LC/MS-MS | 125-71-3   | 8.2             | ng/L                 | Furlong and others, 2014 |
| Diazepam (valium)  | Pharmaceutical           | NWQL                 | LC/MS-MS | 439-14-5   | 4.0             | ng/L                 | Furlong and others, 2014 |
| Diltiazem          | Pharmaceutical           | NWQL                 | LC/MS-MS | 42399-41-7 | 10              | ng/L                 | Furlong and others, 2014 |
| Diphenhydramine    | Pharmaceutical           | NWQL                 | LC/MS-MS | 147-24-0   | 48              | ng/L                 | Furlong and others, 2014 |

| Parameter Name         | Common/primary use/group | Analyzing laboratory | Method   | CAS number  | Reporting limit | Units of measurement | Method citation          |
|------------------------|--------------------------|----------------------|----------|-------------|-----------------|----------------------|--------------------------|
| Duloxetine             | Pharmaceutical           | NWQL                 | LC/MS-MS | 116539-59-4 | 37              | ng/L                 | Furlong and others, 2014 |
| Erythromycin           | Pharmaceutical           | NWQL                 | LC/MS-MS | 114-07-8    | 80              | ng/L                 | Furlong and others, 2014 |
| Ezetimibe              | Pharmaceutical           | NWQL                 | LC/MS-MS | 163222-33-1 | 205             | ng/L                 | Furlong and others, 2014 |
| Fadrozole              | Pharmaceutical           | NWQL                 | LC/MS-MS | 102676-47-1 | 13              | ng/L                 | Furlong and others, 2014 |
| Famotidine             | Pharmaceutical           | NWQL                 | LC/MS-MS | 76824-35-6  | 34              | ng/L                 | Furlong and others, 2014 |
| Fenofibrate            | Pharmaceutical           | NWQL                 | LC/MS-MS | 49562-28-9  | 6.40 - 14.0     | ng/L                 | Furlong and others, 2014 |
| Fexofenadine           | Pharmaceutical           | NWQL                 | LC/MS-MS | 83799-24-0  | 44.0 - 96.0     | ng/L                 | Furlong and others, 2014 |
| Fluconazole            | Pharmaceutical           | NWQL                 | LC/MS-MS | 86386-73-4  | 30              | ng/L                 | Furlong and others, 2014 |
| Fluoxetine             | Pharmaceutical           | NWQL                 | LC/MS-MS | 54910-89-3  | 26              | ng/L                 | Furlong and others, 2014 |
| Fluticasone propionate | Pharmaceutical           | NWQL                 | LC/MS-MS | 80474-14-2  | 30              | ng/L                 | Furlong and others, 2014 |
| Fluvoxamine            | Pharmaceutical           | NWQL                 | LC/MS-MS | 54739-18-3  | 80              | ng/L                 | Furlong and others, 2014 |
| Gabapentin             | Pharmaceutical           | NWQL                 | LC/MS-MS | 60142-96-3  | 160             | ng/L                 | Furlong and others, 2014 |
| Glipizide              | Pharmaceutical           | NWQL                 | LC/MS-MS | 29094-61-9  | 80              | ng/L                 | Furlong and others, 2014 |
| Glyburide              | Pharmaceutical           | NWQL                 | LC/MS-MS | 10238-21-8  | 58              | ng/L                 | Furlong and others, 2014 |
| Guanyldurea            | Pharmaceutical           | NWQL                 | LC/MS-MS | 141-83-3    | 140 - 400       | ng/L                 | Furlong and others, 2014 |
| Hydrocodone            | Pharmaceutical           | NWQL                 | LC/MS-MS | 125-29-1    | 40              | ng/L                 | Furlong and others, 2014 |
| Hydrocortisone         | Pharmaceutical           | NWQL                 | LC/MS-MS | 50-23-7     | 147             | ng/L                 | Furlong and others, 2014 |
| Hydroxyzine            | Pharmaceutical           | NWQL                 | LC/MS-MS | 68-88-2     | 7.4             | ng/L                 | Furlong and others, 2014 |

| Parameter Name          | Common/primary use/group | Analyzing laboratory | Method   | CAS number  | Reporting limit | Units of measurement | Method citation          |
|-------------------------|--------------------------|----------------------|----------|-------------|-----------------|----------------------|--------------------------|
| Iminostilbene           | Pharmaceutical           | NWQL                 | LC/MS-MS | 256-96-2    | 145             | ng/L                 | Furlong and others, 2014 |
| Ketoconazole            | Pharmaceutical           | NWQL                 | LC/MS-MS | 65277-42-1  | 113             | ng/L                 | Furlong and others, 2014 |
| Lamivudine              | Pharmaceutical           | NWQL                 | LC/MS-MS | 134678-17-4 | 16              | ng/L                 | Furlong and others, 2014 |
| Lidocaine               | Pharmaceutical           | NWQL                 | LC/MS-MS | 137-58-6    | 8.00 - 38.0     | ng/L                 | Furlong and others, 2014 |
| Loperamide              | Pharmaceutical           | NWQL                 | LC/MS-MS | 53179-11-6  | 80              | ng/L                 | Furlong and others, 2014 |
| Loratadine              | Pharmaceutical           | NWQL                 | LC/MS-MS | 79794-75-5  | 7.0             | ng/L                 | Furlong and others, 2014 |
| Lorazepam               | Pharmaceutical           | NWQL                 | LC/MS-MS | 846-49-1    | 202             | ng/L                 | Furlong and others, 2014 |
| Meprobamate             | Pharmaceutical           | NWQL                 | LC/MS-MS | 57-53-4     | 12.0 - 86.0     | ng/L                 | Furlong and others, 2014 |
| Metaxalone              | Pharmaceutical           | NWQL                 | LC/MS-MS | 1665-48-1   | 16              | ng/L                 | Furlong and others, 2014 |
| Metformin               | Pharmaceutical           | NWQL                 | LC/MS-MS | 657-24-9    | 13              | ng/L                 | Furlong and others, 2014 |
| Methadone               | Pharmaceutical           | NWQL                 | LC/MS-MS | 76-99-3     | 7.6             | ng/L                 | Furlong and others, 2014 |
| methocarbamol           | Pharmaceutical           | NWQL                 | LC/MS-MS | 532-03-6    | 11              | ng/L                 | Furlong and others, 2014 |
| Methotrexate            | Pharmaceutical           | NWQL                 | LC/MS-MS | 59-05-2     | 52              | ng/L                 | Furlong and others, 2014 |
| methyl-1H-benzotriazole | Pharmaceutical           | NWQL                 | LC/MS-MS | 29385-43-1  | 80              | ng/L                 | Furlong and others, 2014 |
| Metoprolol              | Pharmaceutical           | NWQL                 | LC/MS-MS | 51384-51-1  | 10              | ng/L                 | Furlong and others, 2014 |
| Morphine                | Pharmaceutical           | NWQL                 | LC/MS-MS | 57-27-2     | 80              | ng/L                 | Furlong and others, 2014 |
| Nadalol                 | Pharmaceutical           | NWQL                 | LC/MS-MS | 42200-33-9  | 20              | ng/L                 | Furlong and others, 2014 |
| Nevirapine              | Pharmaceutical           | NWQL                 | LC/MS-MS | 129618-40-2 | 46              | ng/L                 | Furlong and others, 2014 |

| Parameter Name            | Common/primary use/group | Analyzing laboratory | Method   | CAS number  | Reporting limit | Units of measurement | Method citation          |
|---------------------------|--------------------------|----------------------|----------|-------------|-----------------|----------------------|--------------------------|
| nicotine                  | Pharmaceutical           | NWQL                 | LC/MS-MS | 54-11-5     | 58              | ng/L                 | Furlong and others, 2014 |
| Nizatidine                | Pharmaceutical           | NWQL                 | LC/MS-MS | 76963-41-2  | 80              | ng/L                 | Furlong and others, 2014 |
| Nordiazepam               | Pharmaceutical           | NWQL                 | LC/MS-MS | 1088-11-5   | 20              | ng/L                 | Furlong and others, 2014 |
| Norethindrone             | Pharmaceutical           | NWQL                 | LC/MS-MS | 68-22-4     | 20              | ng/L                 | Furlong and others, 2014 |
| Norfluoxetine             | Pharmaceutical           | NWQL                 | LC/MS-MS | 56161-73-0  | 80              | ng/L                 | Furlong and others, 2014 |
| Norsertaline              | Pharmaceutical           | NWQL                 | LC/MS-MS | 87857-41-8  | 80              | ng/L                 | Furlong and others, 2014 |
| Norverapamil              | Pharmaceutical           | NWQL                 | LC/MS-MS | 67018-85-3  | 8.6             | ng/L                 | Furlong and others, 2014 |
| Omeprazole + Esomeprazole | Pharmaceutical           | NWQL                 | LC/MS-MS | -           | 16              | ng/L                 | Furlong and others, 2014 |
| Oseltamivir               | Pharmaceutical           | NWQL                 | LC/MS-MS | 196618-13-0 | 15              | ng/L                 | Furlong and others, 2014 |
| Oxazepam                  | Pharmaceutical           | NWQL                 | LC/MS-MS | 604-75-1    | 226             | ng/L                 | Furlong and others, 2014 |
| Oxycodone                 | Pharmaceutical           | NWQL                 | LC/MS-MS | 76-42-6     | 25              | ng/L                 | Furlong and others, 2014 |
| Paroxetine                | Pharmaceutical           | NWQL                 | LC/MS-MS | 61869-08-7  | 72.0 - 264      | ng/L                 | Furlong and others, 2014 |
| Penciclovir               | Pharmaceutical           | NWQL                 | LC/MS-MS | 39809-25-1  | 80              | ng/L                 | Furlong and others, 2014 |
| Pentoxifylline            | Pharmaceutical           | NWQL                 | LC/MS-MS | 6493-05-6   | 9.4             | ng/L                 | Furlong and others, 2014 |
| Phenazopyridine           | Pharmaceutical           | NWQL                 | LC/MS-MS | 94-78-0     | 13              | ng/L                 | Furlong and others, 2014 |
| Phendimetrazine           | Pharmaceutical           | NWQL                 | LC/MS-MS | 634-03-7    | 20.0 - 31.0     | ng/L                 | Furlong and others, 2014 |
| Phenytoin                 | Pharmaceutical           | NWQL                 | LC/MS-MS | 57-41-0     | 188             | ng/L                 | Furlong and others, 2014 |
| Piperonyl butoxide        | Pharmaceutical           | NWQL                 | LC/MS-MS | 51-03-6     | 60              | ng/L                 | Furlong and others, 2014 |

| Parameter Name              | Common/primary use/group | Analyzing laboratory | Method   | CAS number  | Reporting limit | Units of measurement | Method citation          |
|-----------------------------|--------------------------|----------------------|----------|-------------|-----------------|----------------------|--------------------------|
| Prednisolone                | Pharmaceutical           | NWQL                 | LC/MS-MS | 50-24-8     | 150             | ng/L                 | Furlong and others, 2014 |
| Prednisone                  | Pharmaceutical           | NWQL                 | LC/MS-MS | 53-03-2     | 105 - 168       | ng/L                 | Furlong and others, 2014 |
| Promethazine                | Pharmaceutical           | NWQL                 | LC/MS-MS | 60-87-7     | 114             | ng/L                 | Furlong and others, 2014 |
| Propoxyphene                | Pharmaceutical           | NWQL                 | LC/MS-MS | 469-62-5    | 28              | ng/L                 | Furlong and others, 2014 |
| Propranolol                 | Pharmaceutical           | NWQL                 | LC/MS-MS | 525-66-6    | 26              | ng/L                 | Furlong and others, 2014 |
| Pseudoephedrine + Ephedrine | Pharmaceutical           | NWQL                 | LC/MS-MS | -           | 6               | ng/L                 | Furlong and others, 2014 |
| Quinine                     | Pharmaceutical           | NWQL                 | LC/MS-MS | 130-95-0    | 80              | ng/L                 | Furlong and others, 2014 |
| Ractopamine                 | Pharmaceutical           | NWQL                 | LC/MS-MS | 97825-25-7  | 20              | ng/L                 | Furlong and others, 2014 |
| Raloxifene                  | Pharmaceutical           | NWQL                 | LC/MS-MS | 84449-90-1  | 80              | ng/L                 | Furlong and others, 2014 |
| Ranitidine                  | Pharmaceutical           | NWQL                 | LC/MS-MS | 66357-35-5  | 192             | ng/L                 | Furlong and others, 2014 |
| Sertraline                  | Pharmaceutical           | NWQL                 | LC/MS-MS | 79617-96-2  | 16              | ng/L                 | Furlong and others, 2014 |
| Sitagliptin                 | Pharmaceutical           | NWQL                 | LC/MS-MS | 486460-32-6 | 97              | ng/L                 | Furlong and others, 2014 |
| Sulfadimethoxine            | Pharmaceutical           | NWQL                 | LC/MS-MS | 122-11-2    | 30              | ng/L                 | Furlong and others, 2014 |
| Sulfamethizole              | Pharmaceutical           | NWQL                 | LC/MS-MS | 144-82-1    | 104             | ng/L                 | Furlong and others, 2014 |
| Sulfamethoxazole            | Pharmaceutical           | NWQL                 | LC/MS-MS | 723-46-6    | 20.0 - 26.0     | ng/L                 | Furlong and others, 2014 |
| Tamoxifen                   | Pharmaceutical           | NWQL                 | LC/MS-MS | 10540-29-1  | 270             | ng/L                 | Furlong and others, 2014 |
| Temazepam                   | Pharmaceutical           | NWQL                 | LC/MS-MS | 846-50-4    | 18              | ng/L                 | Furlong and others, 2014 |
| Theophylline                | Pharmaceutical           | NWQL                 | LC/MS-MS | 58-55-9     | 80              | ng/L                 | Furlong and others, 2014 |

| Parameter Name                                            | Common/primary use/group | Analyzing laboratory | Method   | CAS number  | Reporting limit | Units of measurement | Method citation            |
|-----------------------------------------------------------|--------------------------|----------------------|----------|-------------|-----------------|----------------------|----------------------------|
| Thiabendazole                                             | Pharmaceutical           | NWQL                 | LC/MS-MS | 148-79-8    | 4.00 - 11.0     | ng/L                 | Furlong and others, 2014   |
| Tiotropium                                                | Pharmaceutical           | NWQL                 | LC/MS-MS | 186691-13-4 | 50.0 - 200      | ng/L                 | Furlong and others, 2014   |
| Tramadol                                                  | Pharmaceutical           | NWQL                 | LC/MS-MS | 27203-92-5  | 7.4             | ng/L                 | Furlong and others, 2014   |
| Triamterene                                               | Pharmaceutical           | NWQL                 | LC/MS-MS | 396-01-0    | 5.2             | ng/L                 | Furlong and others, 2014   |
| Trimethoprim                                              | Pharmaceutical           | NWQL                 | LC/MS-MS | 738-70-5    | 20              | ng/L                 | Furlong and others, 2014   |
| Valacyclovir                                              | Pharmaceutical           | NWQL                 | LC/MS-MS | 124832-26-4 | 163             | ng/L                 | Furlong and others, 2014   |
| Venlafaxine                                               | Pharmaceutical           | NWQL                 | LC/MS-MS | 93413-69-5  | 5.2             | ng/L                 | Furlong and others, 2014   |
| Verapamil                                                 | Pharmaceutical           | NWQL                 | LC/MS-MS | 52-53-9     | 140             | ng/L                 | Furlong and others, 2014   |
| Warfarin                                                  | Pharmaceutical           | NWQL                 | LC/MS-MS | 81-81-2     | 6.0             | ng/L                 | Furlong and others, 2014   |
| 1H-1,2,4-Triazole                                         | Pesticide                | NWQL                 | LC/MS-MS | 288-88-0    | 22              | ng/L                 | Sandstrom and others, 2015 |
| 2,4-D                                                     | Pesticide                | NWQL                 | LC/MS-MS | 94-75-7     | 62              | ng/L                 | Sandstrom and others, 2015 |
| 2-(1-Hydroxyethyl)-6-methylaniline                        | Pesticide                | NWQL                 | LC/MS-MS | 196611-19-5 | 54.0            | ng/L                 | Sandstrom and others, 2015 |
| 2-[(2-Ethyl-6-methylphenyl)amino]-1-propanol              | Pesticide                | NWQL                 | LC/MS-MS | 61520-53-4  | 5.00            | ng/L                 | Sandstrom and others, 2015 |
| 2-Amino-N-isopropylbenzamide                              | Pesticide                | NWQL                 | LC/MS-MS | 30391-89-0  | 4.0             | ng/L                 | Sandstrom and others, 2015 |
| 2-Aminobenzimidazole                                      | Pesticide                | NWQL                 | LC/MS-MS | 934-32-7    | 9               | ng/L                 | Sandstrom and others, 2015 |
| 2-Chloro-2',6'-diethylacetanilide                         | Pesticide                | NWQL                 | LC/MS-MS | 6967-29-9   | 5.00            | ng/L                 | Sandstrom and others, 2015 |
| 2-Chloro-4,6-diamino-s-triazine {CAAT, Didealkyltriazine} | Pesticide                | NWQL                 | LC/MS-MS | 3397-62-4   | 24.0            | ng/L                 | Sandstrom and others, 2015 |

| Parameter Name                                                                    | Common/primary use/group | Analyzing laboratory | Method   | CAS number | Reporting limit | Units of measurement | Method citation            |
|-----------------------------------------------------------------------------------|--------------------------|----------------------|----------|------------|-----------------|----------------------|----------------------------|
| 2-Chloro-4-isopropylamino-6-amino-s-triazine {CIAT, desethyl atrazine}            | Pesticide                | NWQL                 | LC/MS-MS | 6190-65-4  | 11.0            | ng/L                 | Sandstrom and others, 2015 |
| 2-Chloro-6-ethylamino-4-amino-s-triazine {CEAT, deisopropylatrazine}              | Pesticide                | NWQL                 | LC/MS-MS | 1007-28-9  | 20.0            | ng/L                 | Sandstrom and others, 2015 |
| 2-Chloro-N-(2-ethyl-6-methylphenyl)acetamide                                      | Pesticide                | NWQL                 | LC/MS-MS | 32428-71-0 | 5.00            | ng/L                 | Sandstrom and others, 2015 |
| 2-Hydroxy-4-isopropylamino-6-amino-s-triazine {OIAT, atrazine-desethyl-2-hydroxy} | Pesticide                | NWQL                 | LC/MS-MS | 19988-24-0 | 4.00            | ng/L                 | Sandstrom and others, 2015 |
| 2-Hydroxy-4-isopropylamino-6-ethylamino-s-triazine {OIET, 2-hydroxyatrazine}      | Pesticide                | NWQL                 | LC/MS-MS | 2163-68-0  | 8.00            | ng/L                 | Sandstrom and others, 2015 |
| 2-Hydroxy-6-ethylamino-4-amino-s-triazine {OEAT, disopropylhydroxyatrazine}       | Pesticide                | NWQL                 | LC/MS-MS | 7313-54-4  | 100             | ng/L                 | Sandstrom and others, 2015 |
| 2-Isopropyl-6-methyl-4-pyrimidinol                                                | Pesticide                | NWQL                 | LC/MS-MS | 2814-20-2  | 8               | ng/L                 | Sandstrom and others, 2015 |
| 3,4-Dichlorophenylurea                                                            | Pesticide                | NWQL                 | LC/MS-MS | 2327-02-8  | 108             | ng/L                 | Sandstrom and others, 2015 |
| 3-Hydroxycarbofuran                                                               | Pesticide                | NWQL                 | LC/MS-MS | 16655-82-6 | 16              | ng/L                 | Sandstrom and others, 2015 |
| 3-Phenoxybenzoic acid                                                             | Pesticide                | NWQL                 | LC/MS-MS | 3739-38-6  | 61              | ng/L                 | Sandstrom and others, 2015 |



| Parameter Name                 | Common/primary use/group | Analyzing laboratory | Method   | CAS number  | Reporting limit | Units of measurement | Method citation            |
|--------------------------------|--------------------------|----------------------|----------|-------------|-----------------|----------------------|----------------------------|
| 4-(Hydroxymethyl)pendimethalin | Pesticide                | NWQL                 | LC/MS-MS | 56750-76-6  | 114             | ng/L                 | Sandstrom and others, 2015 |
| 4-Chlorobenzylmethyl sulfoxide | Pesticide                | NWQL                 | LC/MS-MS | 24176-68-9  | 3.2             | ng/L                 | Sandstrom and others, 2015 |
| 4-Hydroxychlorothalonil        | Pesticide                | NWQL                 | LC/MS-MS | 28343-61-5  | 98.0            | ng/L                 | Sandstrom and others, 2015 |
| 4-Hydroxyhexazinone A          | Pesticide                | NWQL                 | LC/MS-MS | 72576-13-7  | 3.00            | ng/L                 | Sandstrom and others, 2015 |
| Acephate                       | Pesticide                | NWQL                 | LC/MS-MS | 30560-19-1  | 10.0            | ng/L                 | Sandstrom and others, 2015 |
| Acetochlor                     | Pesticide                | NWQL                 | LC/MS-MS | 34256-82-1  | 10.0            | ng/L                 | Sandstrom and others, 2015 |
| Acetochlor oxanilic acid       | Pesticide                | NWQL                 | LC/MS-MS | 194992-44-4 | 65.0            | ng/L                 | Sandstrom and others, 2015 |
| Acetochlor sulfonic acid       | Pesticide                | NWQL                 | LC/MS-MS | 187022-11-3 | 320             | ng/L                 | Sandstrom and others, 2015 |
| Acetochlor sulfynilacetic acid | Pesticide                | NWQL                 | LC/MS-MS | 618113-86-3 | 176             | ng/L                 | Sandstrom and others, 2015 |
| Alachlor                       | Pesticide                | NWQL                 | LC/MS-MS | 15972-60-8  | 27.0            | ng/L                 | Sandstrom and others, 2015 |
| Alachlor oxanilic acid         | Pesticide                | NWQL                 | LC/MS-MS | 171262-17-2 | 60.0            | ng/L                 | Sandstrom and others, 2015 |
| Alachlor sulfonic acid         | Pesticide                | NWQL                 | LC/MS-MS | 142363-53-9 | 360             | ng/L                 | Sandstrom and others, 2015 |
| Alachlor sulfynilacetic acid   | Pesticide                | NWQL                 | LC/MS-MS | 494847-39-1 | 128             | ng/L                 | Sandstrom and others, 2015 |
| Aldicarb                       | Pesticide                | NWQL                 | LC/MS-MS | 116-06-3    | 8.00            | ng/L                 | Sandstrom and others, 2015 |
| Aldicarb sulfone               | Pesticide                | NWQL                 | LC/MS-MS | 1646-88-4   | 20.0            | ng/L                 | Sandstrom and others, 2015 |
| Aldicarb sulfoxide             | Pesticide                | NWQL                 | LC/MS-MS | 1646-87-3   | 2.20            | ng/L                 | Sandstrom and others, 2015 |
| Ametryn                        | Pesticide                | NWQL                 | LC/MS-MS | 834-12-8    | 2.60            | ng/L                 | Sandstrom and others, 2015 |

| Parameter Name       | Common/primary use/group | Analyzing laboratory | Method   | CAS number  | Reporting limit | Units of measurement | Method citation            |
|----------------------|--------------------------|----------------------|----------|-------------|-----------------|----------------------|----------------------------|
| Asulam               | Pesticide                | NWQL                 | LC/MS-MS | 3337-71-1   | 50.0            | ng/L                 | Sandstrom and others, 2015 |
| Atrazine             | Pesticide                | NWQL                 | LC/MS-MS | 1912-24-9   | 6.8             | ng/L                 | Sandstrom and others, 2015 |
| Azinphos-methyl      | Pesticide                | NWQL                 | LC/MS-MS | 86-50-0     | 8.00            | ng/L                 | Sandstrom and others, 2015 |
| Azinphos-methyl oxon | Pesticide                | NWQL                 | LC/MS-MS | 961-22-8    | 15.0            | ng/L                 | Sandstrom and others, 2015 |
| Azoxystrobin         | Pesticide                | NWQL                 | LC/MS-MS | 131860-33-8 | 3.00            | ng/L                 | Sandstrom and others, 2015 |
| Bentazon             | Pesticide                | NWQL                 | LC/MS-MS | 25057-89-0  | 9.00            | ng/L                 | Sandstrom and others, 2015 |
| Bifenthrin           | Pesticide                | NWQL                 | LC/MS-MS | 82657-04-3  | 19.0            | ng/L                 | Sandstrom and others, 2015 |
| Bromacil             | Pesticide                | NWQL                 | LC/MS-MS | 314-40-9    | 5.60            | ng/L                 | Sandstrom and others, 2015 |
| Bromoxynil           | Pesticide                | NWQL                 | LC/MS-MS | 1689-84-5   | 60.0            | ng/L                 | Sandstrom and others, 2015 |
| Butralin             | Pesticide                | NWQL                 | LC/MS-MS | 33629-47-9  | 5.00            | ng/L                 | Sandstrom and others, 2015 |
| Butylate             | Pesticide                | NWQL                 | LC/MS-MS | 2008-41-5   | 10.0            | ng/L                 | Sandstrom and others, 2015 |
| Carbaryl             | Pesticide                | NWQL                 | LC/MS-MS | 63-25-2     | 5.60            | ng/L                 | Sandstrom and others, 2015 |
| Carbendazim          | Pesticide                | NWQL                 | LC/MS-MS | 10605-21-7  | 10.0            | ng/L                 | Sandstrom and others, 2015 |
| Carbofuran           | Pesticide                | NWQL                 | LC/MS-MS | 1563-66-2   | 5.00            | ng/L                 | Sandstrom and others, 2015 |
| Chlorimuron-ethyl    | Pesticide                | NWQL                 | LC/MS-MS | 90982-32-4  | 8.80            | ng/L                 | Sandstrom and others, 2015 |
| Chlorpyrifos         | Pesticide                | NWQL                 | LC/MS-MS | 2921-88-2   | 3.00            | ng/L                 | Sandstrom and others, 2015 |
| Chlorpyrifos oxon    | Pesticide                | NWQL                 | LC/MS-MS | -           | 4.40            | ng/L                 | Sandstrom and others, 2015 |
| Chlorsulfuron        | Pesticide                | NWQL                 | LC/MS-MS | 64902-72-3  | 50.0            | ng/L                 | Sandstrom and others, 2015 |

| Parameter Name                                               | Common/primary use/group | Analyzing laboratory | Method   | CAS number   | Reporting limit | Units of measurement | Method citation            |
|--------------------------------------------------------------|--------------------------|----------------------|----------|--------------|-----------------|----------------------|----------------------------|
| cis-Bifenthrin acid/cis-Cyhalothrin acid/cis-Tefluthrin acid | Pesticide                | NWQL                 | LC/MS-MS | 68127-59-3   | 105             | ng/L                 | Sandstrom and others, 2015 |
| cis-Permethrin                                               | Pesticide                | NWQL                 | LC/MS-MS | 61949-76-6   | 4.20            | ng/L                 | Sandstrom and others, 2015 |
| Cyanazine                                                    | Pesticide                | NWQL                 | LC/MS-MS | 21725-46-2   | 50.0            | ng/L                 | Sandstrom and others, 2015 |
| Dacthal monoacid                                             | Pesticide                | NWQL                 | LC/MS-MS | 887-54-7     | 2700            | ng/L                 | Sandstrom and others, 2015 |
| Dechlorofipronil                                             | Pesticide                | NWQL                 | LC/MS-MS | -            | 3.80            | ng/L                 | Sandstrom and others, 2015 |
| Dechlorometolachlor                                          | Pesticide                | NWQL                 | LC/MS-MS | 126605-22-9  | 2.00            | ng/L                 | Sandstrom and others, 2015 |
| Deiodo flubendiamide                                         | Pesticide                | NWQL                 | LC/MS-MS | 1016160-78-3 | 10.0            | ng/L                 | Sandstrom and others, 2015 |
| Deisopropyl prometryn                                        | Pesticide                | NWQL                 | LC/MS-MS | 4147-57-3    | 2.80            | ng/L                 | Sandstrom and others, 2015 |
| Demethyl fluometuron                                         | Pesticide                | NWQL                 | LC/MS-MS | 3032-40-4    | 3.6             | ng/L                 | Sandstrom and others, 2015 |
| Demethyl hexazinone B                                        | Pesticide                | NWQL                 | LC/MS-MS | 56611-54-2   | 3.00            | ng/L                 | Sandstrom and others, 2015 |
| Demethyl norflurazon                                         | Pesticide                | NWQL                 | LC/MS-MS | 23576-24-1   | 4.00            | ng/L                 | Sandstrom and others, 2015 |
| Desamino metribuzin                                          | Pesticide                | NWQL                 | LC/MS-MS | 35045-02-4   | 9.00            | ng/L                 | Sandstrom and others, 2015 |
| Desamino-diketo metribuzin                                   | Pesticide                | NWQL                 | LC/MS-MS | 52236-30-3   | 200             | ng/L                 | Sandstrom and others, 2015 |
| Desulfinylfipronil                                           | Pesticide                | NWQL                 | LC/MS-MS | 205650-65-3  | 3.80            | ng/L                 | Sandstrom and others, 2015 |
| Desulfinylfipronil amide                                     | Pesticide                | NWQL                 | LC/MS-MS | 1115248-09-3 | 10.0            | ng/L                 | Sandstrom and others, 2015 |
| Diazinon                                                     | Pesticide                | NWQL                 | LC/MS-MS | 333-41-5     | 2.80            | ng/L                 | Sandstrom and others, 2015 |
| Diazinon oxon                                                | Pesticide                | NWQL                 | LC/MS-MS | -            | 4.00            | ng/L                 | Sandstrom and others, 2015 |
| Dicamba                                                      | Pesticide                | NWQL                 | LC/MS-MS | 1918-00-9    | 800             | ng/L                 | Sandstrom and others, 2015 |

| Parameter Name             | Common/primary use/group | Analyzing laboratory | Method   | CAS number  | Reporting limit | Units of measurement | Method citation            |
|----------------------------|--------------------------|----------------------|----------|-------------|-----------------|----------------------|----------------------------|
| Dichlorvos                 | Pesticide                | NWQL                 | LC/MS-MS | -           | 52.0            | ng/L                 | Sandstrom and others, 2015 |
| Dicrotophos                | Pesticide                | NWQL                 | LC/MS-MS | 141-66-2    | 4.00            | ng/L                 | Sandstrom and others, 2015 |
| Didemethyl hexazinone F    | Pesticide                | NWQL                 | LC/MS-MS | 56611-55-3  | 10.0            | ng/L                 | Sandstrom and others, 2015 |
| Diflubenzuron              | Pesticide                | NWQL                 | LC/MS-MS | 35367-38-5  | 6.00            | ng/L                 | Sandstrom and others, 2015 |
| Diflufenzopyr              | Pesticide                | NWQL                 | LC/MS-MS | 109293-97-2 | 72.0            | ng/L                 | Sandstrom and others, 2015 |
| Diketonitrile-isoxaflutole | Pesticide                | NWQL                 | LC/MS-MS | 143701-75-1 | 24.0            | ng/L                 | Sandstrom and others, 2015 |
| Dimethenamid               | Pesticide                | NWQL                 | LC/MS-MS | 87674-68-8  | 3.00            | ng/L                 | Sandstrom and others, 2015 |
| Dimethenamid oxanilic acid | Pesticide                | NWQL                 | LC/MS-MS | 380412-59-9 | 85.0            | ng/L                 | Sandstrom and others, 2015 |
| Dimethenamid SAA           | Pesticide                | NWQL                 | LC/MS-MS | -           | 189             | ng/L                 | Sandstrom and others, 2015 |
| Dimethenamid sulfonic acid | Pesticide                | NWQL                 | LC/MS-MS | 205939-58-8 | 79.0            | ng/L                 | Sandstrom and others, 2015 |
| Dimethoate                 | Pesticide                | NWQL                 | LC/MS-MS | 60-51-5     | 4.60            | ng/L                 | Sandstrom and others, 2015 |
| Disulfoton                 | Pesticide                | NWQL                 | LC/MS-MS | 298-04-4    | 11.0            | ng/L                 | Sandstrom and others, 2015 |
| Disulfoton oxon            | Pesticide                | NWQL                 | LC/MS-MS | 126-75-0    | 2.00            | ng/L                 | Sandstrom and others, 2015 |
| Disulfoton oxon sulfone    | Pesticide                | NWQL                 | LC/MS-MS | 2496-91-5   | 6.00            | ng/L                 | Sandstrom and others, 2015 |
| Disulfoton oxon sulfoxide  | Pesticide                | NWQL                 | LC/MS-MS | 2496-92-6   | 6.00            | ng/L                 | Sandstrom and others, 2015 |
| Disulfoton sulfone         | Pesticide                | NWQL                 | LC/MS-MS | 2497-06-5   | 9.00            | ng/L                 | Sandstrom and others, 2015 |
| Disulfoton sulfoxide       | Pesticide                | NWQL                 | LC/MS-MS | 2497-07-6   | 4.00            | ng/L                 | Sandstrom and others, 2015 |
| Diuron                     | Pesticide                | NWQL                 | LC/MS-MS | 330-54-1    | 5.00            | ng/L                 | Sandstrom and others, 2015 |

| Parameter Name         | Common/primary use/group | Analyzing laboratory | Method   | CAS number  | Reporting limit | Units of measurement | Method citation            |
|------------------------|--------------------------|----------------------|----------|-------------|-----------------|----------------------|----------------------------|
| EPTC                   | Pesticide                | NWQL                 | LC/MS-MS | 759-94-4    | 206             | ng/L                 | Sandstrom and others, 2015 |
| EPTC degradate R248722 | Pesticide                | NWQL                 | LC/MS-MS | 65109-69-5  | 4.00            | ng/L                 | Sandstrom and others, 2015 |
| Ethoprophos            | Pesticide                | NWQL                 | LC/MS-MS | 13194-48-4  | 5.00            | ng/L                 | Sandstrom and others, 2015 |
| Etoxazole              | Pesticide                | NWQL                 | LC/MS-MS | 153233-91-1 | 4.20            | ng/L                 | Sandstrom and others, 2015 |
| Fenamiphos             | Pesticide                | NWQL                 | LC/MS-MS | 22224-92-6  | 4.60            | ng/L                 | Sandstrom and others, 2015 |
| Fenamiphos sulfone     | Pesticide                | NWQL                 | LC/MS-MS | 31972-44-8  | 5.00            | ng/L                 | Sandstrom and others, 2015 |
| Fenamiphos sulfoxide   | Pesticide                | NWQL                 | LC/MS-MS | 31972-43-7  | 5.00            | ng/L                 | Sandstrom and others, 2015 |
| Fenbutatin oxide       | Pesticide                | NWQL                 | LC/MS-MS | 13356-08-6  | 120             | ng/L                 | Sandstrom and others, 2015 |
| Fentin                 | Pesticide                | NWQL                 | LC/MS-MS | 668-34-8    | 30.0            | ng/L                 | Sandstrom and others, 2015 |
| Fipronil               | Pesticide                | NWQL                 | LC/MS-MS | 120068-37-3 | 4.00            | ng/L                 | Sandstrom and others, 2015 |
| Fipronil amide         | Pesticide                | NWQL                 | LC/MS-MS | 205650-69-7 | 9.20            | ng/L                 | Sandstrom and others, 2015 |
| Fipronil sulfide       | Pesticide                | NWQL                 | LC/MS-MS | 120067-83-6 | 4.20            | ng/L                 | Sandstrom and others, 2015 |
| Fipronil sulfonate     | Pesticide                | NWQL                 | LC/MS-MS | 209248-72-6 | 96.0            | ng/L                 | Sandstrom and others, 2015 |
| Fipronil sulfone       | Pesticide                | NWQL                 | LC/MS-MS | 120068-36-2 | 5.60            | ng/L                 | Sandstrom and others, 2015 |
| Flubendiamide          | Pesticide                | NWQL                 | LC/MS-MS | 272451-65-7 | 4.40            | ng/L                 | Sandstrom and others, 2015 |
| Flumetsulam            | Pesticide                | NWQL                 | LC/MS-MS | 98967-40-9  | 17.0            | ng/L                 | Sandstrom and others, 2015 |
| Fluometuron            | Pesticide                | NWQL                 | LC/MS-MS | 2164-17-2   | 10.0            | ng/L                 | Sandstrom and others, 2015 |
| Fonofos                | Pesticide                | NWQL                 | LC/MS-MS | 944-22-9    | 11.0            | ng/L                 | Sandstrom and others, 2015 |

| Parameter Name                      | Common/primary use/group | Analyzing laboratory | Method   | CAS number  | Reporting limit | Units of measurement | Method citation            |
|-------------------------------------|--------------------------|----------------------|----------|-------------|-----------------|----------------------|----------------------------|
| Halosulfuron-methyl                 | Pesticide                | NWQL                 | LC/MS-MS | 100784-20-1 | 12.0            | ng/L                 | Sandstrom and others, 2015 |
| Hexazinone                          | Pesticide                | NWQL                 | LC/MS-MS | 51235-04-2  | 3.60            | ng/L                 | Sandstrom and others, 2015 |
| Hexazinone Transformation Product C | Pesticide                | NWQL                 | LC/MS-MS | 72585-88-7  | 2.00            | ng/L                 | Sandstrom and others, 2015 |
| Hexazinone Transformation Product D | Pesticide                | NWQL                 | LC/MS-MS | 30243-77-7  | 294             | ng/L                 | Sandstrom and others, 2015 |
| Hexazinone Transformation Product E | Pesticide                | NWQL                 | LC/MS-MS | 72576-14-8  | 76.0            | ng/L                 | Sandstrom and others, 2015 |
| Hexazinone Transformation Product G | Pesticide                | NWQL                 | LC/MS-MS | -           | 22.0            | ng/L                 | Sandstrom and others, 2015 |
| Hydroxy didemethyl fluometuron      | Pesticide                | NWQL                 | LC/MS-MS | -           | 50.0            | ng/L                 | Sandstrom and others, 2015 |
| Hydroxy monodemethyl fluometuron    | Pesticide                | NWQL                 | LC/MS-MS | -           | 12.0            | ng/L                 | Sandstrom and others, 2015 |
| Hydroxyacetochlor                   | Pesticide                | NWQL                 | LC/MS-MS | 60090-47-3  | 20.0            | ng/L                 | Sandstrom and others, 2015 |
| Hydroxyalachlor                     | Pesticide                | NWQL                 | LC/MS-MS | 56681-55-1  | 6.00            | ng/L                 | Sandstrom and others, 2015 |
| Hydroxydiazinon                     | Pesticide                | NWQL                 | LC/MS-MS | 29820-16-4  | 11.0            | ng/L                 | Sandstrom and others, 2015 |
| Hydroxymetolachlor                  | Pesticide                | NWQL                 | LC/MS-MS | 131068-72-9 | 2.40            | ng/L                 | Sandstrom and others, 2015 |
| Hydroxyphthalazinone                | Pesticide                | NWQL                 | LC/MS-MS | -           | 28.0            | ng/L                 | Sandstrom and others, 2015 |
| Hydroxysimazine                     | Pesticide                | NWQL                 | LC/MS-MS | 2599-11-3   | 120             | ng/L                 | Sandstrom and others, 2015 |
| Imazamox                            | Pesticide                | NWQL                 | LC/MS-MS | 114311-32-9 | 30.0            | ng/L                 | Sandstrom and others, 2015 |
| Imazaquin                           | Pesticide                | NWQL                 | LC/MS-MS | 81335-37-7  | 18.0            | ng/L                 | Sandstrom and others, 2015 |

| Parameter Name                          | Common/primary use/group | Analyzing laboratory | Method   | CAS number  | Reporting limit | Units of measurement | Method citation            |
|-----------------------------------------|--------------------------|----------------------|----------|-------------|-----------------|----------------------|----------------------------|
| Imazethapyr                             | Pesticide                | NWQL                 | LC/MS-MS | 81335-77-5  | 8.00            | ng/L                 | Sandstrom and others, 2015 |
| Imidacloprid                            | Pesticide                | NWQL                 | LC/MS-MS | 138261-41-3 | 16.0            | ng/L                 | Sandstrom and others, 2015 |
| Indoxacarb                              | Pesticide                | NWQL                 | LC/MS-MS | 173584-44-6 | 5.20            | ng/L                 | Sandstrom and others, 2015 |
| Isoxaflutole                            | Pesticide                | NWQL                 | LC/MS-MS | 141112-29-0 | 18.0            | ng/L                 | Sandstrom and others, 2015 |
| Isoxaflutole acid metabolite RPA 203328 | Pesticide                | NWQL                 | LC/MS-MS | 142994-06-7 | 9.20            | ng/L                 | Sandstrom and others, 2015 |
| Kresoxim-methyl                         | Pesticide                | NWQL                 | LC/MS-MS | 143390-89-0 | 5.00            | ng/L                 | Sandstrom and others, 2015 |
| Lactofen                                | Pesticide                | NWQL                 | LC/MS-MS | 77501-63-4  | 10.0            | ng/L                 | Sandstrom and others, 2015 |
| Linuron                                 | Pesticide                | NWQL                 | LC/MS-MS | 330-55-2    | 5.60            | ng/L                 | Sandstrom and others, 2015 |
| Malaoxon                                | Pesticide                | NWQL                 | LC/MS-MS | 1634-78-2   | 2.40            | ng/L                 | Sandstrom and others, 2015 |
| Malathion                               | Pesticide                | NWQL                 | LC/MS-MS | 121-75-5    | 5.40            | ng/L                 | Sandstrom and others, 2015 |
| MCPA                                    | Pesticide                | NWQL                 | LC/MS-MS | 94-74-6     | 95.0            | ng/L                 | Sandstrom and others, 2015 |
| Metalaxyl                               | Pesticide                | NWQL                 | LC/MS-MS | 57837-19-1  | 6.00            | ng/L                 | Sandstrom and others, 2015 |
| Metconazole                             | Pesticide                | NWQL                 | LC/MS-MS | 125116-23-6 | 5.00            | ng/L                 | Sandstrom and others, 2015 |
| Methamidophos                           | Pesticide                | NWQL                 | LC/MS-MS | 10265-92-6  | 10.0            | ng/L                 | Sandstrom and others, 2015 |
| Methidathion                            | Pesticide                | NWQL                 | LC/MS-MS | 950-37-8    | 8.40            | ng/L                 | Sandstrom and others, 2015 |
| Methomyl                                | Pesticide                | NWQL                 | LC/MS-MS | 16752-77-5  | 3.00            | ng/L                 | Sandstrom and others, 2015 |
| Methomyl oxime                          | Pesticide                | NWQL                 | LC/MS-MS | 13749-94-5  | 8000            | ng/L                 | Sandstrom and others, 2015 |
| Methoxyfenozide                         | Pesticide                | NWQL                 | LC/MS-MS | 161050-58-4 | 2.20            | ng/L                 | Sandstrom and others, 2015 |

| Parameter Name                               | Common/primary use/group | Analyzing laboratory | Method   | CAS number  | Reporting limit | Units of measurement | Method citation            |
|----------------------------------------------|--------------------------|----------------------|----------|-------------|-----------------|----------------------|----------------------------|
| Methyl paraxon                               | Pesticide                | NWQL                 | LC/MS-MS | 950-35-6    | 19.0            | ng/L                 | Sandstrom and others, 2015 |
| Metolachlor                                  | Pesticide                | NWQL                 | LC/MS-MS | 51218-45-2  | 3.20            | ng/L                 | Sandstrom and others, 2015 |
| Metolachlor hydroxy morpholinone             | Pesticide                | NWQL                 | LC/MS-MS | 61520-54-5  | 10.0            | ng/L                 | Sandstrom and others, 2015 |
| Metolachlor oxanilic acid                    | Pesticide                | NWQL                 | LC/MS-MS | 152019-73-3 | 149             | ng/L                 | Sandstrom and others, 2015 |
| Metolachlor sulfonic acid                    | Pesticide                | NWQL                 | LC/MS-MS | 171118-09-5 | 68.0            | ng/L                 | Sandstrom and others, 2015 |
| Metribuzin                                   | Pesticide                | NWQL                 | LC/MS-MS | 21087-64-9  | 20.0            | ng/L                 | Sandstrom and others, 2015 |
| Metribuzin DK                                | Pesticide                | NWQL                 | LC/MS-MS | 56507-37-0  | 236             | ng/L                 | Sandstrom and others, 2015 |
| Molinate                                     | Pesticide                | NWQL                 | LC/MS-MS | 2212-67-1   | 28.0            | ng/L                 | Sandstrom and others, 2015 |
| Myclobutanil                                 | Pesticide                | NWQL                 | LC/MS-MS | 88671-89-0  | 7.00            | ng/L                 | Sandstrom and others, 2015 |
| N-(3,4-Dichlorophenyl)-N'-methylurea         | Pesticide                | NWQL                 | LC/MS-MS | 3567-62-2   | 5.00            | ng/L                 | Sandstrom and others, 2015 |
| Naled                                        | Pesticide                | NWQL                 | LC/MS-MS | 300-76-5    | 56.0            | ng/L                 | Sandstrom and others, 2015 |
| Nicosulfuron                                 | Pesticide                | NWQL                 | LC/MS-MS | 111991-09-4 | 12.0            | ng/L                 | Sandstrom and others, 2015 |
| Norflurazon                                  | Pesticide                | NWQL                 | LC/MS-MS | 27314-13-2  | 3.40            | ng/L                 | Sandstrom and others, 2015 |
| Novaluron                                    | Pesticide                | NWQL                 | LC/MS-MS | 116714-46-6 | 50.0            | ng/L                 | Sandstrom and others, 2015 |
| O-Ethyl S-methyl S-propyl phosphorodithioate | Pesticide                | NWQL                 | LC/MS-MS | 76936-72-6  | 3.00            | ng/L                 | Sandstrom and others, 2015 |
| O-Ethyl-O-methyl-S-propylphosphorothioate    | Pesticide                | NWQL                 | LC/MS-MS | 76960-87-7  | 5.00            | ng/L                 | Sandstrom and others, 2015 |
| O-Ethyl-S-propyl phosphorothioate            | Pesticide                | NWQL                 | LC/MS-MS | 31110-62-0  | 64.0            | ng/L                 | Sandstrom and others, 2015 |



| Parameter Name              | Common/primary use/group | Analyzing laboratory | Method   | CAS number  | Reporting limit | Units of measurement | Method citation            |
|-----------------------------|--------------------------|----------------------|----------|-------------|-----------------|----------------------|----------------------------|
| Omethoate (Dimethoate oxon) | Pesticide                | NWQL                 | LC/MS-MS | 1113-02-6   | 2.00            | ng/L                 | Sandstrom and others, 2015 |
| Orthosulfamuron             | Pesticide                | NWQL                 | LC/MS-MS | 213464-77-8 | 6.00            | ng/L                 | Sandstrom and others, 2015 |
| Oryzalin                    | Pesticide                | NWQL                 | LC/MS-MS | 19044-88-3  | 12.0            | ng/L                 | Sandstrom and others, 2015 |
| Oxamyl                      | Pesticide                | NWQL                 | LC/MS-MS | 23135-22-0  | 2.00            | ng/L                 | Sandstrom and others, 2015 |
| Oxamyl oxime                | Pesticide                | NWQL                 | LC/MS-MS | 30558-43-1  | 5.00            | ng/L                 | Sandstrom and others, 2015 |
| Oxyfluorfen                 | Pesticide                | NWQL                 | LC/MS-MS | 42874-03-3  | 500             | ng/L                 | Sandstrom and others, 2015 |
| Paraoxon                    | Pesticide                | NWQL                 | LC/MS-MS | 311-45-5    | 3.40            | ng/L                 | Sandstrom and others, 2015 |
| Pendimethalin               | Pesticide                | NWQL                 | LC/MS-MS | 40487-42-1  | 10.0            | ng/L                 | Sandstrom and others, 2015 |
| Phorate                     | Pesticide                | NWQL                 | LC/MS-MS | 298-02-2    | 11.0            | ng/L                 | Sandstrom and others, 2015 |
| Phorate oxon                | Pesticide                | NWQL                 | LC/MS-MS | 2600-69-3   | 55.0            | ng/L                 | Sandstrom and others, 2015 |
| Phorate oxon sulfone        | Pesticide                | NWQL                 | LC/MS-MS | 2588-06-9   | 20.0            | ng/L                 | Sandstrom and others, 2015 |
| Phorate oxon sulfoxide      | Pesticide                | NWQL                 | LC/MS-MS | 2588-05-8   | 7.00            | ng/L                 | Sandstrom and others, 2015 |
| Phorate sulfone             | Pesticide                | NWQL                 | LC/MS-MS | 2588-04-7   | 36.0            | ng/L                 | Sandstrom and others, 2015 |
| Phorate sulfoxide           | Pesticide                | NWQL                 | LC/MS-MS | 2588-03-6   | 4.60            | ng/L                 | Sandstrom and others, 2015 |
| Phthalazinone               | Pesticide                | NWQL                 | LC/MS-MS | 90004-07-2  | 15.0            | ng/L                 | Sandstrom and others, 2015 |
| Piperonyl butoxide          | Pesticide                | NWQL                 | LC/MS-MS | 51-03-6     | 60.0            | ng/L                 | Sandstrom and others, 2015 |
| Profenofos                  | Pesticide                | NWQL                 | LC/MS-MS | 41198-08-7  | 3.00            | ng/L                 | Sandstrom and others, 2015 |
| Prometon                    | Pesticide                | NWQL                 | LC/MS-MS | 1610-18-0   | 4.00            | ng/L                 | Sandstrom and others, 2015 |

| Parameter Name                | Common/primary use/group | Analyzing laboratory | Method   | CAS number  | Reporting limit | Units of measurement | Method citation            |
|-------------------------------|--------------------------|----------------------|----------|-------------|-----------------|----------------------|----------------------------|
| Prometryn                     | Pesticide                | NWQL                 | LC/MS-MS | 7287-19-6   | 4.20            | ng/L                 | Sandstrom and others, 2015 |
| Propanil                      | Pesticide                | NWQL                 | LC/MS-MS | 709-98-8    | 12.0            | ng/L                 | Sandstrom and others, 2015 |
| Propargite                    | Pesticide                | NWQL                 | LC/MS-MS | 2312-35-8   | 2.00            | ng/L                 | Sandstrom and others, 2015 |
| Propazine                     | Pesticide                | NWQL                 | LC/MS-MS | 139-40-2    | 3.20            | ng/L                 | Sandstrom and others, 2015 |
| Propiconazole                 | Pesticide                | NWQL                 | LC/MS-MS | 60207-90-1  | 6.00            | ng/L                 | Sandstrom and others, 2015 |
| Propoxur                      | Pesticide                | NWQL                 | LC/MS-MS | 114-26-1    | 3.20            | ng/L                 | Sandstrom and others, 2015 |
| Propyzamide                   | Pesticide                | NWQL                 | LC/MS-MS | 23950-58-5  | 2.40            | ng/L                 | Sandstrom and others, 2015 |
| Prosulfuron                   | Pesticide                | NWQL                 | LC/MS-MS | 94125-34-5  | 10.0            | ng/L                 | Sandstrom and others, 2015 |
| Pyraclostrobin                | Pesticide                | NWQL                 | LC/MS-MS | 175013-18-0 | 2.40            | ng/L                 | Sandstrom and others, 2015 |
| Pyridaben                     | Pesticide                | NWQL                 | LC/MS-MS | 96489-71-3  | 2.40            | ng/L                 | Sandstrom and others, 2015 |
| Pyriproxyfen                  | Pesticide                | NWQL                 | LC/MS-MS | 95737-68-1  | 3.00            | ng/L                 | Sandstrom and others, 2015 |
| sec-Aceto chlor oxanilic acid | Pesticide                | NWQL                 | LC/MS-MS | 152019-74-4 | 55.0            | ng/L                 | Sandstrom and others, 2015 |
| Siduron                       | Pesticide                | NWQL                 | LC/MS-MS | 1982-49-6   | 5.00            | ng/L                 | Sandstrom and others, 2015 |
| Simazine                      | Pesticide                | NWQL                 | LC/MS-MS | 122-34-9    | 7.20            | ng/L                 | Sandstrom and others, 2015 |
| Sulfentrazone                 | Pesticide                | NWQL                 | LC/MS-MS | 122836-35-5 | 18.0            | ng/L                 | Sandstrom and others, 2015 |
| Sulfometuron-methyl           | Pesticide                | NWQL                 | LC/MS-MS | 74222-97-2  | 4.00            | ng/L                 | Sandstrom and others, 2015 |
| Sulfosulfuron                 | Pesticide                | NWQL                 | LC/MS-MS | 141776-32-1 | 11.0            | ng/L                 | Sandstrom and others, 2015 |
| Tebuconazole                  | Pesticide                | NWQL                 | LC/MS-MS | 107534-96-3 | 15.0            | ng/L                 | Sandstrom and others, 2015 |

| Parameter Name          | Common/primary use/group | Analyzing laboratory | Method   | CAS number  | Reporting limit | Units of measurement | Method citation            |
|-------------------------|--------------------------|----------------------|----------|-------------|-----------------|----------------------|----------------------------|
| Tebufenozide            | Pesticide                | NWQL                 | LC/MS-MS | 112410-23-8 | 2.00            | ng/L                 | Sandstrom and others, 2015 |
| Tebupirimfos oxon       | Pesticide                | NWQL                 | LC/MS-MS | -           | 2.00            | ng/L                 | Sandstrom and others, 2015 |
| Tebupirimphos           | Pesticide                | NWQL                 | LC/MS-MS | 96182-53-5  | 2.00            | ng/L                 | Sandstrom and others, 2015 |
| Tebuthiuron             | Pesticide                | NWQL                 | LC/MS-MS | 34014-18-1  | 3.00            | ng/L                 | Sandstrom and others, 2015 |
| Tebuthiuron TP 104      | Pesticide                | NWQL                 | LC/MS-MS | 59962-53-7  | 5.60            | ng/L                 | Sandstrom and others, 2015 |
| Tebuthiuron TP 109      | Pesticide                | NWQL                 | LC/MS-MS | 59962-54-8  | 11.0            | ng/L                 | Sandstrom and others, 2015 |
| Tebuthiuron TP 109 (OH) | Pesticide                | NWQL                 | LC/MS-MS | 139888-73-6 | 38.0            | ng/L                 | Sandstrom and others, 2015 |
| Tebuthiuron TP 108      | Pesticide                | NWQL                 | LC/MS-MS | 39222-73-6  | 10.0            | ng/L                 | Sandstrom and others, 2015 |
| Terbacil                | Pesticide                | NWQL                 | LC/MS-MS | 5902-51-2   | 21.0            | ng/L                 | Sandstrom and others, 2015 |
| Terbufos                | Pesticide                | NWQL                 | LC/MS-MS | 13071-79-9  | 6.80            | ng/L                 | Sandstrom and others, 2015 |
| Terbufos oxon           | Pesticide                | NWQL                 | LC/MS-MS | 56070-14-5  | 4.00            | ng/L                 | Sandstrom and others, 2015 |
| Terbufos oxon sulfone   | Pesticide                | NWQL                 | LC/MS-MS | 56070-15-6  | 11.0            | ng/L                 | Sandstrom and others, 2015 |
| Terbufos oxon sulfoxide | Pesticide                | NWQL                 | LC/MS-MS | 56165-57-2  | 4.00            | ng/L                 | Sandstrom and others, 2015 |
| Terbufos sulfone        | Pesticide                | NWQL                 | LC/MS-MS | 56070-16-7  | 11.0            | ng/L                 | Sandstrom and others, 2015 |
| Terbufos sulfoxide      | Pesticide                | NWQL                 | LC/MS-MS | 10548-10-4  | 3.00            | ng/L                 | Sandstrom and others, 2015 |
| Terbuthylazine          | Pesticide                | NWQL                 | LC/MS-MS | 5915-41-3   | 3.60            | ng/L                 | Sandstrom and others, 2015 |
| Tetraconazole           | Pesticide                | NWQL                 | LC/MS-MS | 112281-77-3 | 7.00            | ng/L                 | Sandstrom and others, 2015 |
| Thiobencarb             | Pesticide                | NWQL                 | LC/MS-MS | 28249-77-6  | 4.20            | ng/L                 | Sandstrom and others, 2015 |

| Parameter Name                          | Common/primary use/group | Analyzing laboratory | Method   | CAS number  | Reporting limit | Units of measurement | Method citation            |
|-----------------------------------------|--------------------------|----------------------|----------|-------------|-----------------|----------------------|----------------------------|
| trans-Permethrin                        | Pesticide                | NWQL                 | LC/MS-MS | 61949-77-7  | 3.80            | ng/L                 | Sandstrom and others, 2015 |
| Triallate                               | Pesticide                | NWQL                 | LC/MS-MS | -           | 12.0            | ng/L                 | Sandstrom and others, 2015 |
| Tribufos                                | Pesticide                | NWQL                 | LC/MS-MS | 78-48-8     | 2.00            | ng/L                 | Sandstrom and others, 2015 |
| Triclopyr                               | Pesticide                | NWQL                 | LC/MS-MS | 55335-06-3  | 88.0            | ng/L                 | Sandstrom and others, 2015 |
| Trifloxystrobin                         | Pesticide                | NWQL                 | LC/MS-MS | 141517-21-7 | 2.80            | ng/L                 | Sandstrom and others, 2015 |
| 1,1,1-Trichloro-2-propanone             | DBP/Propanones           | OCRL                 | GC-MS    | 918-00-3    | 0.500           | ug/L                 | Hladik and others, 2014    |
| 1,1-Dichloro-2-propanone                | DBP/Propanones           | OCRL                 | GC-MS    | 513-88-2    | 0.500           | ug/L                 | Hladik and others, 2014    |
| Bromoacetonitrile                       | DBP/Haloacetonitriles    | OCRL                 | GC-MS    | 590-17-0    | 0.100           | ug/L                 | Hladik and others, 2014    |
| Bromochloroacetonitrile                 | DBP/Haloacetonitriles    | OCRL                 | GC-MS    | 83463-62-1  | 0.500           | ug/L                 | Hladik and others, 2014    |
| Bromochloroiodomethane                  | DBP/Trihalomethanes      | OCRL                 | GC-MS    | 34970-00-8  | 0.050           | ug/L                 | Hladik and others, 2014    |
| Bromochloronitromethane                 | DBP/Halonitromethanes    | OCRL                 | GC-MS    | 135531-25-8 | 1.00            | ug/L                 | Hladik and others, 2014    |
| Bromodichloromethane                    | DBP/Trihalomethanes      | OCRL                 | GC-MS    | 75-27-4     | 0.050           | ug/L                 | Hladik and others, 2014    |
| Bromodiiodomethane                      | DBP/Trihalomethanes      | OCRL                 | GC-MS    | 557-95-9    | 0.050           | ug/L                 | Hladik and others, 2014    |
| Bromoform (tribromomethane)             | DBP/Trihalomethanes      | OCRL                 | GC-MS    | 75-25-2     | 0.050           | ug/L                 | Hladik and others, 2014    |
| Bromonitromethane                       | DBP/Halonitromethanes    | OCRL                 | GC-MS    | 563-70-2    | 1.00            | ug/L                 | Hladik and others, 2014    |
| Bromopicrin<br>(Tribromonitromethane)   | DBP/Halonitromethanes    | OCRL                 | GC-MS    | 464-10-8    | 1.00            | ug/L                 | Hladik and others, 2014    |
| Chlorodiiodomethane                     | DBP/Trihalomethanes      | OCRL                 | GC-MS    | 593-71-5    | 0.050           | ug/L                 | Hladik and others, 2014    |
| Chloroform (trichloromethane)           | DBP/Trihalomethanes      | OCRL                 | GC-MS    | 67-66-3     | 0.050           | ug/L                 | Hladik and others, 2014    |
| Chloropicrin<br>(Trichloronitromethane) | DBP/Halonitromethanes    | OCRL                 | GC-MS    | 76-06-2     | 1.00            | ug/L                 | Hladik and others, 2014    |

| Parameter Name            | Common/primary use/group | Analyzing laboratory | Method                | CAS number | Reporting limit | Units of measurement | Method citation                                             |
|---------------------------|--------------------------|----------------------|-----------------------|------------|-----------------|----------------------|-------------------------------------------------------------|
| Dibromoacetonitrile       | DBP/Haloacetonitriles    | OCRL                 | GC-MS                 | 3252-43-5  | 1.00            | ug/L                 | Hladik and others, 2014                                     |
| Dibromochloromethane      | DBP/Trihalomethanes      | OCRL                 | GC-MS                 | 124-48-1   | 0.050           | ug/L                 | Hladik and others, 2014                                     |
| Dibromiodomethane         | DBP/Trihalomethanes      | OCRL                 | GC-MS                 | 563-94-2   | 0.050           | ug/L                 | Hladik and others, 2014                                     |
| Dichloroacetonitrile      | DBP/Haloacetonitriles    | OCRL                 | GC-MS                 | 107-14-2   | 0.100           | ug/L                 | Hladik and others, 2014                                     |
| Dichloriodomethane        | DBP/Trihalomethanes      | OCRL                 | GC-MS                 | 594-04-7   | 0.050           | ug/L                 | Hladik and others, 2014                                     |
| Dichloronitromethane      | DBP/Halonitromethanes    | OCRL                 | GC-MS                 | 7119-89-3  | 0.100           | ug/L                 | Hladik and others, 2014                                     |
| Iodoform (triiodomethane) | DBP/Trihalomethanes      | OCRL                 | GC-MS                 | 75-47-8    | 0.100           | ug/L                 | Hladik and others, 2014                                     |
| Trichloroacetonitrile     | DBP/Haloacetonitriles    | OCRL                 | GC-MS                 | 545-06-2   | 0.100           | ug/L                 | Hladik and others, 2014                                     |
| pH                        | Field measurement        | Field personnel      | Multi-parameter meter | -          | 0.01            | std units            | National Field Manual, variously dated                      |
| Specific conductance      | Field measurement        | Field personnel      | Multi-parameter meter | -          | 5.00            | µS/cm                | National Field Manual, variously dated                      |
| Temperature               | Field measurement        | Field personnel      | Multi-parameter meter | -          | 0.100           | degrees C            | National Field Manual, variously dated                      |
| Alkalinity                | Alkalinity               | RCL                  | Titration             | -          | 2               | mg/L                 | Barringer and Johnsson, 1996 and Fishman and Friedman, 1989 |
| Aluminum                  | Trace element            | RCL                  | ICP-OES               | 7429-90-5  | 0.001           | mg/L                 | EPA, 2014                                                   |
| Antimony                  | Trace element            | RCL                  | ICP-OES               | 7440-36-0  | 0.040           | mg/L                 | EPA, 2014                                                   |
| Arsenic                   | Trace element            | RCL                  | ICP-OES               | 7440-38-2  | 1.00            | ug/L                 | EPA, 2014                                                   |
| Barium                    | Trace element            | RCL                  | ICP-OES               | 7440-39-3  | 0.0005          | mg/L                 | EPA, 2014                                                   |
| Beryllium                 | Trace element            | RCL                  | ICP-OES               | 7440-41-7  | 0.0005          | mg/L                 | EPA, 2014                                                   |
| Boron                     | Trace element            | RCL                  | ICP-OES               | 7440-42-8  | 0.006           | mg/L                 | EPA, 2014                                                   |
| Bromide                   | Trace element            | RCL                  | ICP-OES               | 24959-67-9 | 0.010           | mg/L                 | EPA, 2014                                                   |
| Cadmium                   | Trace element            | RCL                  | ICP-OES               | 7440-43-9  | 0.003           | mg/L                 | EPA, 2014                                                   |
| Calcium                   | Cation                   | RCL                  | ICP-OES               | 7440-70-2  | 0.020           | mg/L                 | EPA, 2014                                                   |
| Chloride                  | Anion                    | RCL                  | IC                    | 16887-00-6 | 0.050           | mg/L                 | EPA, 2013                                                   |
| Chromium                  | Trace element            | RCL                  | ICP-OES               | 7440-47-3  | 0.200           | ug/L                 | EPA, 2014                                                   |
| Cobalt                    | Trace element            | RCL                  | ICP-OES               | 7440-48-4  | 0.003           | mg/L                 | EPA, 2014                                                   |
| Copper                    | Trace element            | RCL                  | ICP-OES               | 7440-50-8  | 0.001           | mg/L                 | EPA, 2014                                                   |
| Fluoride                  | Trace element            | RCL                  | ICP-OES               | 16984-48-8 | 0.050           | mg/L                 | EPA, 2014                                                   |
| Hexavalent chromium       | Trace element            | RCL                  | Cation exchange       | 18540-29-9 | 0.200           | ug/L                 | Ball and McCleskey, 2003                                    |
| Iron                      | Trace element            | RCL                  | ICP-OES               | 7439-89-6  | 0.001           | mg/L                 | EPA, 2014                                                   |

| Parameter Name                                              | Common/primary use/group | Analyzing laboratory | Method           | CAS number  | Reporting limit | Units of measurement | Method citation                                 |
|-------------------------------------------------------------|--------------------------|----------------------|------------------|-------------|-----------------|----------------------|-------------------------------------------------|
| Lead                                                        | Trace element            | RCL                  | ICP-OES          | 7439-92-1   | 0.500           | ug/L                 | Hergenreder, 2011                               |
| Lithium                                                     | Trace element            | RCL                  | ICP-OES          | 7439-93-2   | 0.0005          | mg/L                 | EPA, 2014                                       |
| Magnesium                                                   | Cation                   | RCL                  | ICP-OES          | 7439-95-4   | 0.003           | mg/L                 | EPA, 2014                                       |
| Manganese                                                   | Trace element            | RCL                  | ICP-OES          | 7439-96-5   | 0.001           | mg/L                 | EPA, 2014                                       |
| Molybdenum                                                  | Trace element            | RCL                  | ICP-OES          | 7439-98-7   | 0.005           | mg/L                 | EPA, 2014                                       |
| Nickel                                                      | Trace element            | RCL                  | ICP-OES          | 7440-02-0   | 0.002           | mg/L                 | EPA, 2014                                       |
| Potassium                                                   | Cation                   | RCL                  | ICP-OES          | 7440-09-7   | 0.003           | mg/L                 | EPA, 2014                                       |
| Selenium                                                    | Trace element            | RCL                  | AAS              | 7782-49-2   | 2.00            | ug/l                 | PerkinElmer, 2011                               |
| Silica                                                      | Anion                    | RCL                  | ICP-OES          | -           | 0.010           | mg/L                 | EPA, 2014                                       |
| Sodium                                                      | Cation                   | RCL                  | ICP-OES          | 7440-23-5   | 0.040           | mg/L                 | EPA, 2014                                       |
| Strontium                                                   | Trace element            | RCL                  | ICP-OES          | 7440-24-6   | 0.0005          | mg/L                 | EPA, 2014                                       |
| Sulfate                                                     | Anion                    | RCL                  | IC               | 18785-72-3  | 0.100           | mg/L                 | EPA, 2013                                       |
| Uranium                                                     | Trace element            | RCL                  | ICP-OES          | 7440-61-1   | 0.004           | mg/L                 | EPA, 2014                                       |
| Vanadium                                                    | Trace element            | RCL                  | ICP-OES          | 7440-62-2   | 0.001           | mg/L                 | EPA, 2014                                       |
| Zinc                                                        | Trace element            | RCL                  | ICP-OES          | 7440-66-6   | 0.001           | mg/L                 | EPA, 2014                                       |
| Nitrate + Nitrite                                           | Nutrient                 | NWQL                 | Enzyme reduction | -           | 0.04            | mg/L as N            | Patton and Kryskalla, 2011                      |
| Nitrate                                                     | Nutrient                 | RCL                  | ICP-OES          | -           | 0.050           | mg/L                 | EPA, 2014                                       |
| Phosphorus                                                  | Nutrient                 | RCL                  | IC               | 7723-14-0   | 0.050           | mg/L                 | EPA, 2013                                       |
| 1H,1H,2H,2H-Perfluorohexane sulfonate (4:2) (4:2 FTS)       | PFAS                     | NWQL                 | LC/MS-MS         | 757124-72-4 | 4.68            | ng/L                 | Kolpin and others, 2021, Supporting Information |
| 1H,1H,2H,2H-Perfluorohexane sulfonate (6:2) (6:2 FTS)       | PFAS                     | NWQL                 | LC/MS-MS         | 27619-97-2  | 9.50            | ng/L                 | Kolpin and others, 2021, Supporting Information |
| 1H,1H,2H,2H-Perfluorohexane sulfonate (8:2) (8:2 FTS)       | PFAS                     | NWQL                 | LC/MS-MS         | 39108-34-4  | 24.0            | ng/L                 | Kolpin and others, 2021, Supporting Information |
| 9-Chlorohexadecafluoro-3-oxanonane-1-sulfonate (9Cl-PF3ONS) | PFAS                     | NWQL                 | LC/MS-MS         | 756426-58-1 | 25.0            | ng/L                 | Kolpin and others, 2021, Supporting Information |

| Parameter Name                                         | Common/primary use/group | Analyzing laboratory | Method   | CAS number  | Reporting limit | Units of measurement | Method citation                                 |
|--------------------------------------------------------|--------------------------|----------------------|----------|-------------|-----------------|----------------------|-------------------------------------------------|
| Perfluorobutane sulfonamide (FBSA)                     | PFAS                     | NWQL                 | LC/MS-MS | 30334-69-1  | 50.0            | ng/L                 | Kolpin and others, 2021, Supporting Information |
| Perfluoro-1-hexanesulfonamide (FHx-SA)                 | PFAS                     | NWQL                 | LC/MS-MS | 41997-13-1  | 10.0            | ng/L                 | Kolpin and others, 2021, Supporting Information |
| Perfluoro-1-octanesulfonamide (FOSA)                   | PFAS                     | NWQL                 | LC/MS-MS | 754-91-6    | 1.00            | ng/L                 | Kolpin and others, 2021, Supporting Information |
| Hexafluoropropylene oxide dimer acid (HFPO-DA)(GenX)   | PFAS                     | NWQL                 | LC/MS-MS | 13252-13-6  | 2.50            | ng/L                 | Kolpin and others, 2021, Supporting Information |
| 4,8-Dioxa-3H-perfluorononanoate (NaDONA, ADONA)        | PFAS                     | NWQL                 | LC/MS-MS | 919005-14-4 | 1.00            | ng/L                 | Kolpin and others, 2021, Supporting Information |
| N-ethyl perfluorooctanesulfonamidoacetate (N-EtFOSAA)  | PFAS                     | NWQL                 | LC/MS-MS | 2991-50-6   | 5.00            | ng/L                 | Kolpin and others, 2021, Supporting Information |
| N-Ethylperfluorooctane-1-sulfonamide (N-EtFOSA-M)      | PFAS                     | NWQL                 | LC/MS-MS | 4151-50-2   | 10.1            | ng/L                 | Kolpin and others, 2021, Supporting Information |
| N-methylperfluorooctane sulfonamidoacetate (N-MeFOSAA) | PFAS                     | NWQL                 | LC/MS-MS | 2355-31-9   | 10.0            | ng/L                 | Kolpin and others, 2021, Supporting Information |
| Perfluorobutyrate (PFBA)                               | PFAS                     | NWQL                 | LC/MS-MS | 375-22-4    | 5.00            | ng/L                 | Kolpin and others, 2021, Supporting Information |
| Perfluoro-1-butanefulfonate (PFBS)                     | PFAS                     | NWQL                 | LC/MS-MS | 375-73-5    | 2.21            | ng/L                 | Kolpin and others, 2021, Supporting Information |
| Perfluoro-n-decanoate (PFDA)                           | PFAS                     | NWQL                 | LC/MS-MS | 83-89-6     | 5.00            | ng/L                 | Kolpin and others, 2021, Supporting Information |
| Perfluorododecanoate (PFDoDA)                          | PFAS                     | NWQL                 | LC/MS-MS | 307-55-14   | 25.0            | ng/L                 | Kolpin and others, 2021, Supporting Information |

| Parameter Name                                | Common/primary use/group | Analyzing laboratory | Method   | CAS number | Reporting limit | Units of measurement | Method citation                                 |
|-----------------------------------------------|--------------------------|----------------------|----------|------------|-----------------|----------------------|-------------------------------------------------|
| Perfluoro-1-decanesulfonate (PFDS)            | PFAS                     | NWQL                 | LC/MS-MS | 335-77-3   | 9.65            | ng/L                 | Kolpin and others, 2021, Supporting Information |
| Perfluoro-n-heptanoate (PFHpA)                | PFAS                     | NWQL                 | LC/MS-MS | 375-85-9   | 5.00            | ng/L                 | Kolpin and others, 2021, Supporting Information |
| Perfluoro-1-heptanesulfonate (PFHpS)          | PFAS                     | NWQL                 | LC/MS-MS | 375-92-8   | 4.75            | ng/L                 | Kolpin and others, 2021, Supporting Information |
| Perfluoro-n-hexanoate (PFHxA)                 | PFAS                     | NWQL                 | LC/MS-MS | 307-24-4   | 10.0            | ng/L                 | Kolpin and others, 2021, Supporting Information |
| Perfluoro-1-hexanesulfonate (PFHxS)(linear)   | PFAS                     | NWQL                 | LC/MS-MS | 355-46-4   | 1.85-4.40       | ng/L                 | Kolpin and others, 2021, Supporting Information |
| Perfluoro-1-hexanesulfonate (PFHxS)(branched) | PFAS                     | NWQL                 | LC/MS-MS | 355-46-4   | 2.28-4.67       | ng/L                 | Kolpin and others, 2021, Supporting Information |
| Perfluoro-n-nonanoate (PFNA)                  | PFAS                     | NWQL                 | LC/MS-MS | 375-95-1   | 5.00-8.00       | ng/L                 | Kolpin and others, 2021, Supporting Information |
| Perfluoro-1-nonanesulfonate (PFNS)            | PFAS                     | NWQL                 | LC/MS-MS | 68259-12-1 | 2.40-2.70       | ng/L                 | Kolpin and others, 2021, Supporting Information |
| Perfluoro-n-octanoate (PFOA)                  | PFAS                     | NWQL                 | LC/MS-MS | 335-67-1   | 2.50            | ng/L                 | Kolpin and others, 2021, Supporting Information |
| Perfluorooctanesulfonate (PFOS)(linear)       | PFAS                     | NWQL                 | LC/MS-MS | 1763-23-1  | 18.3            | ng/L                 | Kolpin and others, 2021, Supporting Information |
| Perfluorooctanesulfonate (PFOS)(branched)     | PFAS                     | NWQL                 | LC/MS-MS | 1763-23-1  | 9.26            | ng/L                 | Kolpin and others, 2021, Supporting Information |
| Perfluoro-n-pentanoate (PFPeA)                | PFAS                     | NWQL                 | LC/MS-MS | 2706-90-3  | 10.0            | ng/L                 | Kolpin and others, 2021, Supporting Information |
| Perfluoro-1-pentanesulfonate (PFPeS)          | PFAS                     | NWQL                 | LC/MS-MS | 2706-91-4  | 2.35            | ng/L                 | Kolpin and others, 2021, Supporting Information |
| Perfluoro-n-tetradecanoate (PFTeDA)           | PFAS                     | NWQL                 | LC/MS-MS | 376-06-7   | 10.1            | ng/L                 | Kolpin and others, 2021, Supporting Information |



| Parameter Name                         | Common/primary use/group  | Analyzing laboratory | Method   | CAS number | Reporting limit | Units of measurement | Method citation                                 |
|----------------------------------------|---------------------------|----------------------|----------|------------|-----------------|----------------------|-------------------------------------------------|
| Perfluoro-n-tridecanoate (PFTrDA)      | PFAS                      | NWQL                 | LC/MS-MS | 72629-94-8 | 10.1            | ng/L                 | Kolpin and others, 2021, Supporting Information |
| Perfluoro-n-undecanoate (PFUnDA)       | PFAS                      | NWQL                 | LC/MS-MS | 2058-94-8  | 10.0            | ng/L                 | Kolpin and others, 2021, Supporting Information |
| 1,1,1,2-Tetrachloroethane              | Volatile organic compound | NWQL                 | GC/MS    | 630-20-6   | 0.04            | ug/L                 | Rose and others, 2016                           |
| 1,1,1-Trichloroethane                  | Volatile organic compound | NWQL                 | GC/MS    | 71-55-6    | 0.03            | ug/L                 | Rose and others, 2016                           |
| 1,1,2-Trichloroethane                  | Volatile organic compound | NWQL                 | GC/MS    | 79-00-5    | 0.046           | ug/L                 | Rose and others, 2016                           |
| 1,1-Dichloroethane                     | Volatile organic compound | NWQL                 | GC/MS    | 75-34-3    | 0.044           | ug/L                 | Rose and others, 2016                           |
| 1,1-Dichloroethene                     | Volatile organic compound | NWQL                 | GC/MS    | 75-35-4    | 0.025           | ug/L                 | Rose and others, 2016                           |
| 1,1-Difluoroethane                     | Volatile organic compound | NWQL                 | GC/MS    | 75-37-6    | 0.025           | ug/L                 | Rose and others, 2016                           |
| 1,2,3,4-Tetrahydronaphthalene          | Volatile organic compound | NWQL                 | GC/MS    | 119-64-2   | 0.08            | ug/L                 | Rose and others, 2016                           |
| 1,2,4-Trichlorobenzene                 | Volatile organic compound | NWQL                 | GC/MS    | 120-82-1   | 0.08            | ug/L                 | Rose and others, 2016                           |
| 1,2,4-Trimethylbenzene                 | Volatile organic compound | NWQL                 | GC/MS    | 95-63-6    | 0.032           | ug/L                 | Rose and others, 2016                           |
| 1,2-Dichloro-1,1,2,2-tetrafluoroethane | Volatile organic compound | NWQL                 | GC/MS    | 76-14-2    | 0.03            | ug/L                 | Rose and others, 2016                           |
| 1,2-Dichlorobenzene                    | Volatile organic compound | NWQL                 | GC/MS    | 95-50-1    | 0.028           | ug/L                 | Rose and others, 2016                           |
| 1,2-Dichloroethane                     | Volatile organic compound | NWQL                 | GC/MS    | 107-06-2   | 0.08            | ug/L                 | Rose and others, 2016                           |
| 1,3-Butadiene                          | Volatile organic compound | NWQL                 | GC/MS    | 106-99-0   | 0.08            | ug/L                 | Rose and others, 2016                           |
| 1,4-Dichlorobenzene                    | Volatile organic compound | NWQL                 | GC/MS    | 106-46-7   | 0.026           | ug/L                 | Rose and others, 2016                           |
| 1-Chloro-1,1-difluoroethane            | Volatile organic compound | NWQL                 | GC/MS    | 75-68-3    | 0.08            | ug/L                 | Rose and others, 2016                           |

| Parameter Name                     | Common/primary use/group  | Analyzing laboratory | Method | CAS number  | Reporting limit | Units of measurement | Method citation       |
|------------------------------------|---------------------------|----------------------|--------|-------------|-----------------|----------------------|-----------------------|
| 2,2-Dichloro-1,1,1-trifluoroethane | Volatile organic compound | NWQL                 | GC/MS  | 306-83-2    | 0.025           | ug/L                 | Rose and others, 2016 |
| Benzene                            | Volatile organic compound | NWQL                 | GC/MS  | 71-43-2     | 0.026           | ug/L                 | Rose and others, 2016 |
| Bromochloromethane                 | Volatile organic compound | NWQL                 | GC/MS  | 74-97-5     | 0.06            | ug/L                 | Rose and others, 2016 |
| Bromodichloromethane               | Volatile organic compound | NWQL                 | GC/MS  | 75-27-4     | 0.034           | ug/L                 | Rose and others, 2016 |
| Bromomethane                       | Volatile organic compound | NWQL                 | GC/MS  | 74-83-9     | 0.2             | ug/L                 | Rose and others, 2016 |
| Butane                             | Volatile organic compound | NWQL                 | GC/MS  | 106-97-8    | 0.08            | ug/L                 | Rose and others, 2016 |
| Carbon disulfide                   | Volatile organic compound | NWQL                 | GC/MS  | 75-15-0     | 0.1             | ug/L                 | Rose and others, 2016 |
| Chlorobenzene                      | Volatile organic compound | NWQL                 | GC/MS  | 108-90-7    | 0.026           | ug/L                 | Rose and others, 2016 |
| Chlorodifluoromethane              | Volatile organic compound | NWQL                 | GC/MS  | 75-45-6     | 0.04            | ug/L                 | Rose and others, 2016 |
| Chloromethane                      | Volatile organic compound | NWQL                 | GC/MS  | 74-87-3     | 0.2             | ug/L                 | Rose and others, 2016 |
| cis-1,2-Dichloroethene             | Volatile organic compound | NWQL                 | GC/MS  | 156-59-2    | 0.025           | ug/L                 | Rose and others, 2016 |
| cis-1,3-Dichloropropene            | Volatile organic compound | NWQL                 | GC/MS  | 10061-01-5  | 0.1             | ug/L                 | Rose and others, 2016 |
| Dibromochloromethane               | Volatile organic compound | NWQL                 | GC/MS  | 124-48-1    | 0.12            | ug/L                 | Rose and others, 2016 |
| Dichlorofluoromethane              | Volatile organic compound | NWQL                 | GC/MS  | 75-43-4     | 0.05            | ug/L                 | Rose and others, 2016 |
| Dichloromethane                    | Volatile organic compound | NWQL                 | GC/MS  | 75-09-2     | 0.04            | ug/L                 | Rose and others, 2016 |
| Ethylbenzene                       | Volatile organic compound | NWQL                 | GC/MS  | 100-41-4    | 0.036           | ug/L                 | Rose and others, 2016 |
| Hexane                             | Volatile organic compound | NWQL                 | GC/MS  | 110-54-3    | 0.068           | ug/L                 | Rose and others, 2016 |
| m- and p-Xylene                    | Volatile organic compound | NWQL                 | GC/MS  | 179601-23-1 | 0.08            | ug/L                 | Rose and others, 2016 |

| Parameter Name             | Common/primary use/group  | Analyzing laboratory | Method | CAS number | Reporting limit | Units of measurement | Method citation       |
|----------------------------|---------------------------|----------------------|--------|------------|-----------------|----------------------|-----------------------|
| Methyl tert-butyl ether    | Volatile organic compound | NWQL                 | GC/MS  | 1634-04-4  | 0.1             | ug/L                 | Rose and others, 2016 |
| n-Pentane                  | Volatile organic compound | NWQL                 | GC/MS  | 109-66-0   | 0.066           | ug/L                 | Rose and others, 2016 |
| n-Propylbenzene            | Volatile organic compound | NWQL                 | GC/MS  | 103-65-1   | 0.036           | ug/L                 | Rose and others, 2016 |
| Naphthalene                | Volatile organic compound | NWQL                 | GC/MS  | 91-20-3    | 0.26            | ug/L                 | Rose and others, 2016 |
| o-Xylene                   | Volatile organic compound | NWQL                 | GC/MS  | 95-47-6    | 0.032           | ug/L                 | Rose and others, 2016 |
| sec-Butylbenzene           | Volatile organic compound | NWQL                 | GC/MS  | 135-98-8   | 0.034           | ug/L                 | Rose and others, 2016 |
| Styrene                    | Volatile organic compound | NWQL                 | GC/MS  | 100-42-5   | 0.042           | ug/L                 | Rose and others, 2016 |
| Tetrachloroethylene        | Volatile organic compound | NWQL                 | GC/MS  | 127-18-4   | 0.058           | ug/L                 | Rose and others, 2016 |
| Tetrachloromethane         | Volatile organic compound | NWQL                 | GC/MS  | 56-23-5    | 0.06            | ug/L                 | Rose and others, 2016 |
| Toluene                    | Volatile organic compound | NWQL                 | GC/MS  | 108-88-3   | 0.2             | ug/L                 | Rose and others, 2016 |
| trans-1,2-Dichloroethylene | Volatile organic compound | NWQL                 | GC/MS  | 156-60-5   | 0.025           | ug/L                 | Rose and others, 2016 |
| trans-1,3-Dichloropropene  | Volatile organic compound | NWQL                 | GC/MS  | 10061-02-6 | 0.1             | ug/L                 | Rose and others, 2016 |
| Tribromomethane            | Volatile organic compound | NWQL                 | GC/MS  | 75-25-2    | 0.14            | ug/L                 | Rose and others, 2016 |
| Trichloroethylene          | Volatile organic compound | NWQL                 | GC/MS  | 79-01-6    | 0.025           | ug/L                 | Rose and others, 2016 |
| Trichloromethane           | Volatile organic compound | NWQL                 | GC/MS  | 67-66-3    | 0.03            | ug/L                 | Rose and others, 2016 |
| Vinyl chloride             | Volatile organic compound | NWQL                 | GC/MS  | 75-01-4    | 0.06            | ug/L                 | Rose and others, 2016 |
| 1,1-Dichloro-2-propanone   | Volatile organic compound | NWQL                 | GC/MS  | 513-88-2   | 0.24            | ug/L                 | Rose and others, 2016 |
| 1,2,3-Trichloropropane     | Volatile organic compound | NWQL                 | GC/MS  | 96-18-4    | 0.006           | ug/L                 | Rose and others, 2016 |

| Parameter Name                | Common/primary use/group  | Analyzing laboratory | Method | CAS number | Reporting limit | Units of measurement | Method citation       |
|-------------------------------|---------------------------|----------------------|--------|------------|-----------------|----------------------|-----------------------|
| 1,2-Dibromo-3-chloropropane   | Volatile organic compound | NWQL                 | GC/MS  | 96-12-8    | 0.020           | ug/L                 | Rose and others, 2016 |
| 1,2-Dibromoethane             | Volatile organic compound | NWQL                 | GC/MS  | 106-93-4   | 0.004           | ug/L                 | Rose and others, 2016 |
| 1,2-Dichloropropane           | Volatile organic compound | NWQL                 | GC/MS  | 78-87-5    | 0.004           | ug/L                 | Rose and others, 2016 |
| 1,3-Dioxolane                 | Volatile organic compound | NWQL                 | GC/MS  | 646-06-0   | 0.38            | ug/L                 | Rose and others, 2016 |
| 1,4-Dioxane                   | Volatile organic compound | NWQL                 | GC/MS  | 123-91-1   | 0.2             | ug/L                 | Rose and others, 2016 |
| 1-octanol                     | Volatile organic compound | NWQL                 | GC/MS  | 111-87-5   | 1.8             | ug/L                 | Rose and others, 2016 |
| 1Methoxy-4(2-propenyl)benzene | Volatile organic compound | NWQL                 | GC/MS  | 140-67-0   | 0.92            | ug/L                 | Rose and others, 2016 |
| 2-ethoxyethyl acetate         | Volatile organic compound | NWQL                 | GC/MS  | 111-15-9   | 5.4             | ug/L                 | Rose and others, 2016 |
| 2-hexanone, 5-methyl-         | Volatile organic compound | NWQL                 | GC/MS  | 110-12-3   | 0.022           | ug/L                 | Rose and others, 2016 |
| 2-Nitropropane                | Volatile organic compound | NWQL                 | GC/MS  | 79-46-9    | 0.12            | ug/L                 | Rose and others, 2016 |
| 2-pentanol, 4-methyl-         | Volatile organic compound | NWQL                 | GC/MS  | 108-11-2   | 0.2             | ug/L                 | Rose and others, 2016 |
| 2-Propen-1-ol                 | Volatile organic compound | NWQL                 | GC/MS  | 107-18-6   | 7.8             | ug/L                 | Rose and others, 2016 |
| 4-heptanone, 2,6-dimethyl-    | Volatile organic compound | NWQL                 | GC/MS  | 108-83-8   | 0.032           | ug/L                 | Rose and others, 2016 |
| acetate, ethyl                | Volatile organic compound | NWQL                 | GC/MS  | 141-78-6   | 0.06            | ug/L                 | Rose and others, 2016 |
| acetate, isobutyl             | Volatile organic compound | NWQL                 | GC/MS  | 110-19-0   | 0.028           | ug/L                 | Rose and others, 2016 |
| acetate, isopropyl            | Volatile organic compound | NWQL                 | GC/MS  | 108-21-4   | 0.01            | ug/L                 | Rose and others, 2016 |
| acetate, propyl               | Volatile organic compound | NWQL                 | GC/MS  | 109-60-4   | 0.032           | ug/L                 | Rose and others, 2016 |
| acetonitrile                  | Volatile organic compound | NWQL                 | GC/MS  | 75-05-8    | 0.8             | ug/L                 | Rose and others, 2016 |

| Parameter Name            | Common/primary use/group  | Analyzing laboratory | Method | CAS number  | Reporting limit | Units of measurement | Method citation         |
|---------------------------|---------------------------|----------------------|--------|-------------|-----------------|----------------------|-------------------------|
| alpha-Terpineol           | Volatile organic compound | NWQL                 | GC/MS  | 98-55-5     | 2.2             | ug/L                 | Rose and others, 2016   |
| Butanal                   | Volatile organic compound | NWQL                 | GC/MS  | 123-72-8    | 0.38            | ug/L                 | Rose and others, 2016   |
| butanol                   | Volatile organic compound | NWQL                 | GC/MS  | 71-36-3     | 0.8             | ug/L                 | Rose and others, 2016   |
| Chloropicrin              | Volatile organic compound | NWQL                 | GC/MS  | 76-06-2     | 0.14            | ug/L                 | Rose and others, 2016   |
| cyclohexanone             | Volatile organic compound | NWQL                 | GC/MS  | 108-94-1    | 1.2             | ug/L                 | Rose and others, 2016   |
| diethylamine, n-nitroso-  | Volatile organic compound | NWQL                 | GC/MS  | 55-18-5     | 6.2             | ug/L                 | Rose and others, 2016   |
| Dimethoxymethane          | Volatile organic compound | NWQL                 | GC/MS  | 109-87-5    | 0.044           | ug/L                 | Rose and others, 2016   |
| Hexachlorocyclopentadiene | Volatile organic compound | NWQL                 | GC/MS  | 77-47-4     | 10              | ug/L                 | Rose and others, 2016   |
| hexanol, 2-ethyl-         | Volatile organic compound | NWQL                 | GC/MS  | 104-76-7    | 4.4             | ug/L                 | Rose and others, 2016   |
| Isophorone                | Volatile organic compound | NWQL                 | GC/MS  | 78-59-1     | 2.4             | ug/L                 | Rose and others, 2016   |
| isopropyl alcohol         | Volatile organic compound | NWQL                 | GC/MS  | 67-63-0     | 0.6             | ug/L                 | Rose and others, 2016   |
| Methyl acetate            | Volatile organic compound | NWQL                 | GC/MS  | 79-20-9     | 0.14            | ug/L                 | Rose and others, 2016   |
| Methyl tert-butyl ether   | Volatile organic compound | NWQL                 | GC/MS  | 1634-04-4   | 0.012           | ug/L                 | Rose and others, 2016   |
| n-Pentanal                | Volatile organic compound | NWQL                 | GC/MS  | 110-62-3    | 0.054           | ug/L                 | Rose and others, 2016   |
| Nitrobenzene              | Volatile organic compound | NWQL                 | GC/MS  | 98-95-3     | 1.4             | ug/L                 | Rose and others, 2016   |
| tert-Butyl alcohol        | Volatile organic compound | NWQL                 | GC/MS  | 75-65-0     | 0.24            | ug/L                 | Rose and others, 2016   |
| trans-Crotonaldehyde      | Volatile organic compound | NWQL                 | GC/MS  | 123-73-9    | 2.6             | ug/L                 | Rose and others, 2016   |
| Microcystins              | Cyanotoxins               | OGRL                 | ELISA  | 101043-37-2 | 0.100           | ug/L                 | Loftin and others, 2016 |
| Saxitoxins                | Cyanotoxins               | OGRL                 | ELISA  | 35523-89-8  | 0.02            | ug/L                 | Loftin and others, 2016 |
| Cylindrospermopsin        | Cyanotoxins               | OGRL                 | ELISA  | 143545-90-8 | 0.05            | ug/L                 | Loftin and others, 2016 |

| Parameter Name                 | Common/primary use/group         | Analyzing laboratory | Method   | CAS number | Reporting limit | Units of measurement | Method citation         |
|--------------------------------|----------------------------------|----------------------|----------|------------|-----------------|----------------------|-------------------------|
| Anatoxin-A                     | Cyanotoxins                      | OGRL                 | ELISA    | 64285-06-9 | 0.15            | ug/L                 | Loftin and others, 2016 |
| 17B-Estradiol (E2)             | Estrogen receptor agonists       | EPA, ORD             | T47KBlu  | -          | 0.028           | ng/L (equivalent)    | Conley and others, 2017 |
| 4,5a-Dihydrotestosterone (DHT) | Androgen receptor agonists       | EPA, ORD             | CV1-chAR | -          | 0.74            | ng/L (equivalent)    | Conley and others, 2017 |
| Dexamethasone (DEX)            | Glucocorticoid receptor agonists | EPA, ORD             | CV1-hGR  | -          | 6.59            | ng/L (equivalent)    | Conley and others, 2017 |

Table S3. Summary data for detected organic compounds, in micrograms per liter, analyzed in source water, finished water, and service-area tapwater samples collected for the U.S. Geological Survey (USGS) Ecosystems Mission Area Environmental Health Infrastructure Project, Minnesota Tapwater Exposure Study, 2019. Also included are any exceedances of health advisories. For data on all organic compounds detected please see Romanok et al., 2023 (<https://doi.org/10.5066/P9YQ24QW>)

[MCL, Maximum Contaminant Level set by the U.S. Environmental Protection Agency; MCLG, Maximum Contaminant Level Goal, maximum level of a contaminant in drinking water at which no known or anticipated adverse effect on the health of persons would occur, allowing an adequate margin of safety. MCLG are non-enforceable public health goals. MCL and MCLG are available at <https://www.epa.gov/dwregdev/how-epa-regulates-drinking-water-contaminants>. WHO, World Health Organization drinking water guidelines. HA exceedances, number of exceedances of health advisories, including MCLG.]

| Site code    | Site type | Source of water | SHA exceedances (MCL) | SHA exceedances (MCLG) | Sum Organics | Count Organics | Sum DBP | Count DBP | Sum Pest | Count Pest | Sum Pharm | Count Pharm | Sum VOC | Count VOC | Sum PFAS | Count PFAS |
|--------------|-----------|-----------------|-----------------------|------------------------|--------------|----------------|---------|-----------|----------|------------|-----------|-------------|---------|-----------|----------|------------|
| MNTW2019 023 | Source    | Surface water   | 0                     | 1                      | 1.9          | 14             | 1.6     | 3         | 0.013    | 3          | 0.003     | 1           | 0.183   | 3         | 0.041    | 3          |
| MNTW2019 022 | Finished  | Surface water   | 0                     | 2                      | 13.7         | 8              | 13.7    | 7         | 0        | 0          | 0         | 0           | 0       | 0         | 0.015    | 1          |
| MNTW2019 025 | Tap       | Surface water   | 0                     | 2                      | 15.4         | 9              | 14.8    | 6         | 0        | 0          | 0         | 0           | 0.627   | 2         | 0.014    | 1          |
| MNTW2019 024 | Tap       | Surface water   | 0                     | 2                      | 33.9         | 18             | 31.6    | 8         | 0.020    | 1          | 0         | 0           | 2.28    | 8         | 0.014    | 1          |
| MNTW2019 010 | Source    | Groundwater     | 0                     | 1                      | 0.2          | 5              | 0       | 0         | 0        | 0          | 0         | 0           | 0.138   | 3         | 0.021    | 2          |
| MNTW2019 009 | Finished  | Groundwater     | 0                     | 3                      | 15.6         | 12             | 15.5    | 8         | 0        | 0          | 0         | 0           | 0.107   | 3         | 0.018    | 1          |
| MNTW2019 007 | Tap       | Groundwater     | 0                     | 3                      | 4.7          | 20             | 3.0     | 8         | 0.033    | 3          | 0.004     | 1           | 1.66    | 7         | 0.011    | 1          |
| MNTW2019 008 | Tap       | Groundwater     | 0                     | 3                      | 4.0          | 14             | 3.2     | 7         | 0        | 0          | 0.033     | 1           | 0.743   | 5         | 0.013    | 1          |
| MNTW2019 027 | Source    | Groundwater     | 0                     | 1                      | 2.7          | 23             | 0.10    | 1         | 1.99     | 14         | 0         | 0           | 0.170   | 3         | 0.461    | 5          |
| MNTW2019 026 | Finished  | Groundwater     | 0                     | 3                      | 4.7          | 25             | 2.4     | 4         | 1.76     | 14         | 0         | 0           | 0.175   | 3         | 0.347    | 4          |

| Site code    | Site type | Source of water | SHA exceedances (MCL) | SHA exceedances (MCLG) | Sum Organics | Count Organics | Sum DBP | Count DBP | Sum Pest | Count Pest | Sum Pharm | Count Pharm | Sum VOC | Count VOC | Sum PFAS | Count PFAS |
|--------------|-----------|-----------------|-----------------------|------------------------|--------------|----------------|---------|-----------|----------|------------|-----------|-------------|---------|-----------|----------|------------|
| MNTW2019 030 | Tap       | Groundwater     | 0                     | 4                      | 5.0          | 25             | 3.8     | 5         | 0.839    | 11         | 0.014     | 1           | 0.156   | 5         | 0.239    | 3          |
| MNTW2019 028 | Source    | Groundwater     | 0                     | 1                      | 2.1          | 24             | 0       | 0         | 1.88     | 18         | 0.012     | 2           | 0.113   | 2         | 0.145    | 2          |
| MNTW2019 029 | Finished  | Groundwater     | 0                     | 1                      | 2.25         | 22             | 0       | 0         | 1.94     | 15         | 0.005     | 2           | 0.140   | 3         | 0.167    | 2          |
| MNTW2019 031 | Tap       | Groundwater     | 0                     | 3                      | 2.93         | 24             | 0.400   | 4         | 2.29     | 14         | 0.004     | 2           | 0.073   | 1         | 0.166    | 3          |
| MNTW2019 037 | Source    | Groundwater     | 0                     | 0                      | 2.34         | 6              | 0       | 0         | 0        | 0          | 0         | 0           | 2.33    | 5         | 0.013    | 1          |
| MNTW2019 036 | Finished  | Groundwater     | 0                     | 3                      | 12.0         | 19             | 11.4    | 8         | 0.023    | 3          | 0         | 0           | 0.576   | 7         | 0.016    | 1          |
| MNTW2019 038 | Tap       | Groundwater     | 0                     | 3                      | 19.5         | 17             | 18.6    | 10        | 0.011    | 2          | 0         | 0           | 0.882   | 3         | 0.016    | 2          |
| MNTW2019 039 | Tap       | Groundwater     | 0                     | 5                      | 19.0         | 18             | 18.4    | 10        | 0.005    | 2          | 0         | 0           | 0.570   | 5         | 0.014    | 1          |
| MNTW2019 011 | Source    | Surface water   | 0                     | 1                      | 97.0         | 33             | 0       | 0         | 0.463    | 14         | 0.175     | 9           | 95.8    | 8         | 0.011    | 1          |
| MNTW2019 012 | Finished  | Surface water   | 0                     | 1                      | 27.3         | 12             | 27.0    | 7         | 0.099    | 2          | 0         | 0           | 0.200   | 2         | 0.009    | 1          |
| MNTW2019 013 | Tap       | Surface water   | 0                     | 2                      | 22.7         | 14             | 22.4    | 8         | 0.013    | 1          | 0         | 0           | 0.222   | 4         | 0.009    | 1          |
| MNTW2019 014 | Tap       | Surface water   | 0                     | 1                      | 21.8         | 14             | 21.6    | 8         | 0.028    | 2          | 0         | 0           | 0.181   | 3         | 0.008    | 1          |
| MNTW2019 020 | Source    | Groundwater     | 0                     | 0                      | 1.14         | 10             | 0.100   | 1         | 0.993    | 6          | 0         | 0           | 0.030   | 1         | 0.014    | 2          |
| MNTW2019 019 | Finished  | Groundwater     | 0                     | 2                      | 9.53         | 13             | 8.30    | 5         | 1.216    | 7          | 0         | 0           | 0       | 0         | 0.013    | 1          |
| MNTW2019 006 | Tap       | Groundwater     | 0                     | 2                      | 9.61         | 16             | 8.72    | 6         | 0.768    | 6          | 0.031     | 1           | 0.078   | 2         | 0.010    | 1          |
| MNTW2019 018 | Source    | Groundwater     | 0                     | 0                      | 0.826        | 9              | 0       | 0         | 0.705    | 7          | 0         | 0           | 0.107   | 1         | 0.0145   | 1          |
| MNTW2019 017 | Finished  | Groundwater     | 0                     | 2                      | 7.90         | 16             | 7.10    | 4         | 0.678    | 8          | 0         | 0           | 0.105   | 2         | 0.0145   | 2          |
| MNTW2019 021 | Tap       | Groundwater     | 0                     | 2                      | 14.6         | 21             | 13.2    | 7         | 1.021    | 8          | 0         | 0           | 0.331   | 4         | 0.0122   | 2          |
| MNTW2019 002 | Source    | Groundwater     | 0                     | 1                      | 0.245        | 11             | 0       | 0         | 0.071    | 5          | 0         | 0           | 0.030   | 2         | 0.1438   | 4          |
| MNTW2019 005 | Tap       | Groundwater     | 0                     | 0                      | 0.094        | 3              | 0       | 0         | 0        | 0          | 0         | 0           | 0.068   | 1         | 0.0261   | 2          |
| MNTW2019 004 | Source    | Surface water   | 0                     | 0                      | 3.15         | 17             | 0       | 0         | 0.307    | 12         | 0         | 0           | 1.33    | 3         | 0.0174   | 1          |
| MNTW2019 003 | Finished  | Surface water   | 0                     | 2                      | 37.0         | 24             | 36.7    | 9         | 0.213    | 9          | 0         | 0           | 0.112   | 3         | 0.0230   | 3          |
| MNTW2019 001 | Tap       | Surface water   | 0                     | 2                      | 36.8         | 25             | 36.4    | 9         | 0.350    | 13         | 0         | 0           | 0       | 0         | 0.0266   | 3          |
| MNTW2019 016 | Source    | Groundwater     | 0                     | 0                      | 0.180        | 3              | 0       | 0         | 0.017    | 1          | 0.009     | 1           | 0       | 0         | 0.1547   | 1          |
| MNTW2019 015 | Tap       | Groundwater     | 0                     | 0                      | 0.164        | 2              | 0       | 0         | 0        | 0          | 0.010     | 1           | 0       | 0         | 0.1540   | 1          |
| MNTW2019 033 | Source    | Groundwater     | 0                     | 0                      | 0.639        | 12             | 0       | 0         | 0.385    | 9          | 0         | 0           | 0       | 0         | 0.2537   | 3          |
| MNTW2019 032 | Finished  | Groundwater     | 0                     | 0                      | 1.70         | 15             | 0       | 0         | 0.866    | 9          | 0         | 0           | 0.600   | 1         | 0.2312   | 5          |
| MNTW2019 034 | Tap       | Groundwater     | 0                     | 2                      | 10.0         | 27             | 8.66    | 8         | 0.304    | 10         | 0         | 0           | 0.773   | 5         | 0.2370   | 4          |
| MNTW2019 035 | Tap       | Groundwater     | 0                     | 2                      | 10.1         | 22             | 9.07    | 7         | 0.642    | 9          | 0         | 0           | 0.185   | 4         | 0.2018   | 2          |

Table S4. Subset of detected trace element and ion concentrations (in units shown) in source water, finished water, and service-area tapwater samples collected for the U.S. Geological Survey (USGS) Ecosystems Mission Area, Environmental Health Infrastructure Project, Minnesota Tapwater Exposure Study, 2019. See Table S2 for additional analytical details. For data on all organic compounds detected please see Romanok et al., 2023 (<https://doi.org/10.5066/P9YQ24QW>)

[MCL shown in red, Maximum Contaminant Level set by the U.S. Environmental Protection Agency; MCLG, Maximum Contaminant Level Goal, maximum level of a contaminant in drinking water at which no known or anticipated adverse effect on the health of persons would occur, allowing an adequate margin of safety. MCLG shown in orange are non-enforceable public health goals. MCL and MCLG are available at <https://www.epa.gov/dwregdev/how-epa-regulates-drinking-water-contaminants>. WHO, World Health Organization drinking water guidelines. HA exceedances, number of exceedances of health advisories, including MCLG.]

| Site code    | Site type | Source of water | Chloride (mg/L) | Fluoride (mg/L) | Nitrate-N (NO3-N; mg/L) | Phosphorus-P (mg/L) | Magnesium (mg/L) | Potassium (mg/L) | Aluminum (µg/L) | Arsenic (µg/L) | Barium (µg/L) | Boron (µg/L) | Cadmium (µg/L) | Chromium (µg/L) | Chromium (Hexavalent; µg/L) | Cobalt (µg/L) | Copper (µg/L) | Iron (µg/L) | Lead (µg/L) | Lithium (µg/L) | Manganese (µg/L) | Nickel (µg/L) | Selenium (µg/L) | Strontium (µg/L) | Uranium (µg/L) | Zinc (µg/L) | SHA exceedances (MCL) | SHA exceedances (MCLG) |
|--------------|-----------|-----------------|-----------------|-----------------|-------------------------|---------------------|------------------|------------------|-----------------|----------------|---------------|--------------|----------------|-----------------|-----------------------------|---------------|---------------|-------------|-------------|----------------|------------------|---------------|-----------------|------------------|----------------|-------------|-----------------------|------------------------|
| MNTW2019 023 | Source    | SW              | 181             | 0.1             | 1.07                    | nd                  | 50.7             | 3.27             | 9               | nd             | 140           | 31           | nd             | nd              | nd                          | nd            | 6             | 20.6        | nd          | 9.9            | 5                | nd            | nd              | 182              | nd             | 12          | 0                     | 0                      |
| MNTW2019 022 | Finished  | SW              | 78              | 0.6             | 0.37                    | 0.7                 | 34.9             | 3.95             | 9               | nd             | 189           | 70           | nd             | nd              | nd                          | nd            | 2             | 4           | nd          | 11             | 17               | nd            | nd              | 303              | 4              | 7           | 0                     | 1                      |
| MNTW2019 025 | Tap       | SW              | 60              | 0.58            | 0.24                    | 0.8                 | 32.7             | 3.94             | 9               | nd             | 186           | 73           | nd             | nd              | nd                          | nd            | 195           | 7           | 0.6         | 10             | 12               | nd            | nd              | 305              | nd             | 29          | 0                     | 1                      |
| MNTW2019 024 | Tap       | SW              | 71              | 0.59            | 0.32                    | 0.8                 | 33.3             | 3.9              | 9               | nd             | 190           | 73           | nd             | nd              | nd                          | nd            | 504           | 14.9        | 0.8         | 11             | 8                | nd            | nd              | 305              | nd             | 17          | 0                     | 1                      |
| MNTW2019 010 | Source    | GW              | 81              | 0.16            | nd                      | nd                  | 38.8             | 1.96             | 8               | nd             | 228           | 27           | nd             | 0.8             | 0.6                         | nd            | nd            | 761         | nd          | 5.5            | 59               | nd            | nd              | 207              | nd             | 12          | 0                     | 0                      |
| MNTW2019 009 | Finished  | GW              | 84              | 0.23            | 0.03                    | 0.3                 | 38.7             | 1.99             | 7               | nd             | 227           | 28           | nd             | nd              | nd                          | nd            | 20            | 1280        | 0.8         | 5.4            | 67               | nd            | nd              | 209              | 5              | 48          | 0                     | 2                      |
| MNTW2019 007 | Tap       | GW              | 46              | 0.62            | 0.04                    | 0.7                 | 34.5             | 1.91             | 8               | nd             | 152           | 31           | nd             | 0.3             | 0.3                         | nd            | 82            | 16.7        | nd          | 5.3            | 16               | nd            | nd              | 178              | nd             | 13          | 0                     | 0                      |
| MNTW2019 008 | Tap       | GW              | 83              | 0.6             | 0.04                    | 0.7                 | 38.5             | 2.02             | 8               | nd             | 198           | 24           | nd             | nd              | nd                          | nd            | 327           | 116         | 0.6         | 5.7            | 58               | nd            | nd              | 201              | nd             | 11          | 0                     | 1                      |
| MNTW2019 027 | Source    | GW              | 73              | 0.08            | 8.03                    | nd                  | 37.7             | 1.2              | 8               | nd             | 53            | 10           | nd             | 2.4             | 0.7                         | nd            | 32            | nd          | nd          | 2.5            | nd               | nd            | nd              | 109              | nd             | 110         | 0                     | 0                      |
| MNTW2019 026 | Finished  | GW              | 114             | 0.13            | NR                      | nd                  | 37.4             | 1.19             | 6               | nd             | 47            | 10           | nd             | nd              | nd                          | nd            | nd            | nd          | nd          | 2.4            | nd               | nd            | nd              | 103              | nd             | 5           | 0                     | 0                      |
| MNTW2019 030 | Tap       | GW              | 72              | 0.08            | 5.28                    | nd                  | 30.7             | 1.48             | 7               | nd             | 46            | 16           | nd             | 0.2             | 0.2                         | nd            | 80            | nd          | nd          | 3.1            | nd               | nd            | nd              | 100              | nd             | 35          | 0                     | 0                      |
| MNTW2019 028 | Source    | GW              | 38              | 0.07            | 5.93                    | nd                  | 27.4             | 1.76             | 7               | nd             | 48            | 21           | nd             | 0.4             | 0.4                         | nd            | 6             | 32.5        | nd          | 3.6            | 1                | nd            | nd              | 97               | nd             | 28          | 0                     | 0                      |
| MNTW2019 029 | Finished  | GW              | 38              | 0.1             | 5.84                    | nd                  | 27.2             | 1.77             | 7               | nd             | 49            | 23           | nd             | 0.4             | 0.4                         | nd            | 47            | 20.7        | 2.7         | 3.6            | nd               | nd            | nd              | 97               | nd             | 21          | 0                     | 1                      |
| MNTW2019 031 | Tap       | GW              | 37              | 0.08            | 5.19                    | nd                  | 27.1             | 1.76             | 9               | nd             | 48            | 22           | nd             | nd              | nd                          | nd            | 94            | 149         | 2.9         | 3.8            | 8                | nd            | nd              | 97               | nd             | 356         | 0                     | 1                      |
| MNTW2019 037 | Source    | GW              | 38              | 0.16            | nd                      | nd                  | 49.8             | 2.75             | 8               | nd             | 111           | 32           | nd             | nd              | nd                          | nd            | 7             | 12.5        | 1.3         | 7.2            | 598              | nd            | nd              | 224              | nd             | 11          | 0                     | 1                      |
| MNTW2019 036 | Finished  | GW              | 85              | 0.27            | 0.13                    | 0.1                 | 45.3             | 2.99             | 9               | nd             | 138           | 41           | nd             | nd              | nd                          | nd            | 9             | nd          | 0.6         | 7.9            | 3                | 15            | nd              | 208              | nd             | 128         | 0                     | 1                      |
| MNTW2019 038 | Tap       | GW              | 87              | 0.65            | 0.08                    | 0.1                 | 43.6             | 3.1              | 8               | nd             | 140           | 41           | nd             | nd              | nd                          | nd            | 12            | 6           | nd          | 8.3            | 27               | nd            | nd              | 212              | nd             | 138         | 0                     | 0                      |
| MNTW2019 039 | Tap       | GW              | 90              | 0.6             | 0.07                    | 0.2                 | 44.1             | 3.18             | 8               | nd             | 136           | 40           | nd             | nd              | nd                          | nd            | 1040          | 45.8        | nd          | 8.7            | 8                | nd            | nd              | 213              | 5              | 124         | 0                     | 1                      |
| MNTW2019 011 | Source    | SW              | 27              | 0.08            | nd                      | 0.1                 | 14.8             | 2                | 183             | nd             | 58            | 25           | nd             | 0.8             | 0.4                         | nd            | 5             | 985         | nd          | 4.2            | 382              | nd            | nd              | 92               | 4              | 9           | 0                     | 1                      |
| MNTW2019 012 | Finished  | SW              | 30              | 0.8             | 0.38                    | 0.3                 | 2.06             | 2.07             | 23              | nd             | 14            | 19           | nd             | 0.5             | 0.2                         | nd            | 2             | 2           | nd          | 4.2            | nd               | nd            | nd              | 70               | nd             | 4           | 0                     | 0                      |
| MNTW2019 013 | Tap       | SW              | 28              | 0.81            | 0.60                    | 0.3                 | 1.94             | 2.05             | 34              | nd             | 13            | 18           | nd             | 0.5             | 0.5                         | nd            | 45            | 17          | 1.3         | 4.5            | nd               | nd            | nd              | 77               | nd             | 8           | 0                     | 1                      |
| MNTW2019 014 | Tap       | SW              | 27              | 0.79            | 0.62                    | 0.3                 | 2.13             | 2.03             | 29              | nd             | 13            | 19           | nd             | 0.3             | nd                          | nd            | 43            | 24.5        | 0.7         | 4.5            | nd               | nd            | nd              | 77               | nd             | 9           | 0                     | 1                      |
| MNTW2019 020 | Source    | GW              | 43              | 0.13            | 5.51                    | nd                  | 37               | 3.34             | 8               | nd             | 225           | 37           | nd             | 0.6             | 0.4                         | nd            | 36            | nd          | 4.5         | 13             | 26               | nd            | nd              | 278              | nd             | 15          | 0                     | 1                      |
| MNTW2019 019 | Finished  | GW              | 48              | 0.14            | 5.61                    | nd                  | 37               | 3.3              | 10              | nd             | 242           | 35           | nd             | 0.4             | 0.3                         | nd            | 47            | nd          | 8.4         | 13             | 354              | nd            | nd              | 277              | nd             | 26          | 0                     | 1                      |
| MNTW2019 006 | Tap       | GW              | 54              | 0.66            | 4.31                    | nd                  | 38.8             | 3.32             | 8               | nd             | 126           | 37           | nd             | 0.4             | 0.3                         | nd            | 187           | nd          | 1.6         | 13             | 1                | nd            | nd              | 280              | nd             | 138         | 0                     | 1                      |
| MNTW2019 018 | Source    | GW              | 81              | 0.1             | 4.65                    | nd                  | 32.9             | 3.46             | 7               | nd             | 213           | 26           | nd             | 0.5             | nd                          | nd            | 5             | nd          | nd          | 8.9            | 35               | 6             | nd              | 182              | nd             | 20          | 0                     | 0                      |
| MNTW2019 017 | Finished  | GW              | 80              | 0.65            | 4.74                    | nd                  | 32.3             | 3.44             | 9               | nd             | 215           | 26           | nd             | 0.4             | nd                          | nd            | 128           | 6           | 78.1        | 8.8            | 35               | nd            | nd              | 179              | 4              | 27          | 1                     | 2                      |
| MNTW2019 021 | Tap       | GW              | 49              | 0.6             | 3.89                    | nd                  | 35               | 3.31             | 9               | nd             | 80            | 43           | nd             | 0.5             | 0.6                         | nd            | 24            | 2           | nd          | 9.8            | nd               | nd            | nd              | 231              | nd             | 23          | 0                     | 0                      |
| MNTW2019 002 | Source    | GW              | 90              | 1.14            | 3.45                    | nd                  | 36.6             | 2.11             | 8               | nd             | 69            | 24           | nd             | 1.8             | 0.7                         | nd            | 8             | nd          | nd          | 5.7            | 5                | nd            | nd              | 148              | nd             | 37          | 0                     | 0                      |
| MNTW2019 005 | Tap       | GW              | 8.9             | 0.26            | nd                      | nd                  | 0.05             | 0.48             | nd              | nd             | nd            | 29           | nd             | nd              | nd                          | nd            | 22            | 12.1        | nd          | 1.3            | nd               | nd            | nd              | nd               | nd             | 7           | 0                     | 0                      |
| MNTW2019 004 | Source    | SW              | 33              | 0.11            | nd                      | nd                  | 12.4             | 2.14             | 6               | nd             | 41            | 19           | nd             | nd              | nd                          | nd            | 194           | 51.3        | nd          | 3              | 46               | nd            | nd              | 70               | nd             | 5           | 0                     | 0                      |
| MNTW2019 003 | Finished  | SW              | 45              | 0.68            | 0.17                    | nd                  | 1.7              | 2.27             | 16              | nd             | 13            | 19           | nd             | nd              | nd                          | nd            | 5             | 30.5        | 11.6        | 3.1            | nd               | 7             | nd              | 69               | nd             | 13          | 0                     | 1                      |
| MNTW2019 001 | Tap       | SW              | 41              | 0.66            | 0.21                    | nd                  | 1.63             | 2.27             | 18              | nd             | 13            | 17           | nd             | nd              | nd                          | nd            | 5             | 11.1        | 3           | 3.2            | nd               | nd            | nd              | 68               | nd             | 15          | 0                     | 1                      |
| MNTW2019 016 | Source    | GW              | 76              | 0.08            | 0.03                    | nd                  | 37.7             | 2.32             | 9               | 2              | 255           | 28           | nd             | nd              | nd                          | nd            | 1             | 1840        | 0.6         | 8              | 608              | nd            | nd              | 186              | 4              | 12          | 0                     | 3                      |
| MNTW2019 015 | Tap       | GW              | 76              | 0.07            | nd                      | nd                  | 37.5             | 2.33             | 8               | nd             | 260           | 25           | nd             | nd              | nd                          | nd            | 3             | 715         | nd          | 8              | 577              | nd            | nd              | 190              | 4              | 641         | 0                     | 1                      |
| MNTW2019 033 | Source    | GW              | 39              | 0.2             | 0.79                    | 0.4                 | 23.8             | 2.4              | 7               | nd             | 64            | 9            | nd             | nd              | nd                          | nd            | 18            | 3           | 0.9         | 2.3            | 43               | 4             | 3               | 72               | 4              | 20          | 0                     | 2                      |
| MNTW2019 032 | Finished  | GW              | 39              | 5.52            | 0.79                    | 0.1                 | 23.9             | 2.37             | 9               | nd             | 69            | 10           | 3              | nd              | nd                          | 4             | 48            | 403         | 23.2        | 2.5            | 211              | 16            | 3               | 72               | nd             | 1110        | 2                     | 2                      |
| MNTW2019 034 | Tap       | GW              | 41              | 0.79            | 0.77                    | 0.2                 | 0.1              | 0.4              | nd              | nd             | nd            | 9            | nd             | nd              | nd                          | nd            | 459           | 5           | 0.9         | nd             | 5                | 5             | 3               | nd               | nd             | 29          | 0                     | 1                      |
| MNTW2019 035 | Tap       | GW              | 44              | 0.79            | 0.58                    | 0.1                 | 26.8             | 1.56             | 7               | nd             | 25            | 8            | nd             | nd              | nd                          | nd            | 404           | 21.3        | 2.3         | 3.3            | 9                | 7             | nd              | 79               | 6              | 63          | 0                     | 2                      |



Table S5. Quality assurance organic and inorganic analyte results (units listed) laboratory blanks analyzed at the U.S. Geological Survey, Redox Chemistry laboratory, Boulder, Colorado in bottled water samples collected for the USGS Ecosystems Mission Area, Environmental Health Infrastructure Project, Minnesota Tapwater Exposure Study, 2019. See Table S2 for analytical details and detection limits.

[mg/L; milligram per liter; nd, not detected; µg/L, microgram per liter]

[Inorganic and organic analyte results were censored to the corresponding maximum concentration detected in laboratory blanks, above.]

[No inorganic analyte results were censored because detections were higher than twice the concentration detected in laboratory blanks. Organic analyte results for 2-i-Pr-6-Me-4-pyrimidinol were censored to the concentration of the blank and it resulted in removal from the dataset.]

| Blank number | Blank Type | Potassium (mg/L) | Sodium (mg/L) | 2-i-Pr-6-Me-4-pyrimidinol (µg/L) |
|--------------|------------|------------------|---------------|----------------------------------|
| 1            | Field      | nd               | nd            | nd                               |
| 2            | Field      | nd               | nd            | 0.0053                           |
| 3            | Field      | nd               | nd            | 0.0039                           |
| 4            | Field      | nd               | nd            | 0.0040                           |
| 5            | Laboratory | 0.006            | nd            | --                               |
| 6            | Laboratory | nd               | 0.054         | --                               |

Table S6. Quality assurance surrogate recovery or internal dilution standard summary statistics (percent) for the U.S. Geological Survey (USGS) Ecosystems Mission Area, Environmental Health Infrastructure Project, Minnesota Tapwater Exposure Study, 2019.

[NWQL; USGS National Water Quality Laboratory, OCRL; USGS Organic Chemistry Research Laboratory]

| Analyzing Agency | Surrogate compound name   | Minimum (%) | Median (%) | Maximum (%) |
|------------------|---------------------------|-------------|------------|-------------|
| OCRL             | Bromofluorobenzene        | 101         | 104        | 107         |
| OCRL             | 1,2-Dichlorobenzene-d4    | 95.6        | 101        | 104         |
| NWQL             | 62835 Isobutylalcohol-d6  | 87.5        | 113        | 122         |
| NWQL             | 90359 Lorazepam-d4        | 73.3        | 100        | 123         |
| NWQL             | 90360 Propoxyphene-d11    | 116         | 150        | 196         |
| NWQL             | 90361 Ketoconazole-d4     | 8.3         | 40.1       | 178         |
| NWQL             | 90362 Oxazepam-d5         | 75.1        | 93.5       | 121         |
| NWQL             | 90363 Carisoprodol-d7     | 83.4        | 96.4       | 107         |
| NWQL             | 90364 Amitriptyline-d3rog | 111         | 175        | 241         |

| Analyzing Agency | Surrogate compound name          | Minimum (%) | Median (%) | Maximum (%) |
|------------------|----------------------------------|-------------|------------|-------------|
| NWQL             | 90365 Erythromycin-13C,d3        | 55          | 139        | 216         |
| NWQL             | 90366 Ezetimibe-d4               | 50.7        | 110        | 226         |
| NWQL             | 90367 Fenofibrate-d6             | 17.4        | 51.3       | 101         |
| NWQL             | 90368 Fexofenadine-d10           | 85.4        | 109        | 122         |
| NWQL             | 90369 Fluvoxamine-d4             | 51          | 125        | 178         |
| NWQL             | 90370 Loperamide-d6              | 46.7        | 126        | 218         |
| NWQL             | 90371 Loratadine-d4              | 32.2        | 61.7       | 90.4        |
| NWQL             | 90372 Desmethyldiltiazem-d4      | 91.3        | 141        | 190         |
| NWQL             | 90373 Promethazine-d6            | 0           | 139        | 874         |
| NWQL             | 90374 Raloxifene-d10             | 43.6        | 120        | 404         |
| NWQL             | 90375 Ranitidine-d6              | 0.6         | 147        | 747         |
| NWQL             | 90376 Tiotropium-d3              | 111         | 200        | 324         |
| NWQL             | 90377 Verapamil-d6               | 49.7        | 162        | 290         |
| NWQL             | 90378 Tamoxifen-d5               | 31.9        | 98.6       | 413         |
| NWQL             | 90379 Hydrocortisone-13C3        | 66.4        | 105        | 147         |
| NWQL             | 90395 Metformin-d6               | 14.8        | 72         | 83.8        |
| NWQL             | 90516 3-Phenoxybenzoic acid-13C6 | 99.4        | 109        | 115         |
| NWQL             | 90517 Acetochlor-d11             | 89.4        | 109        | 132         |
| NWQL             | 90518 Alachlor-d13               | 92.3        | 105        | 114         |
| NWQL             | 90519 Carbaryl-d7                | 97.6        | 110        | 123         |
| NWQL             | 90520 Carbendazim-d4             | 79.6        | 101        | 116         |
| NWQL             | 90521 Carbofuran-d3              | 103         | 111        | 123         |
| NWQL             | 90522 Deethylatrazine-d6         | 76.1        | 95.3       | 110         |
| NWQL             | 90523 Diazinon-d10               | 91          | 109        | 145         |
| NWQL             | 90524 Diflubenzuron-d4           | 91.7        | 106        | 129         |
| NWQL             | 90527 Hexazinone-d6              | 93.2        | 103        | 116         |
| NWQL             | 90529 Linuron-d6                 | 97.4        | 103        | 119         |
| NWQL             | 90552 Malathion-d10              | 94          | 114        | 129         |
| NWQL             | 90553 Metolachlor-d6             | 92.3        | 101        | 114         |
| NWQL             | 90554 Nicosulfuron-d6            | 7.78        | 101        | 131         |
| NWQL             | 90555 Tebuconazole-d6            | 58.3        | 95.2       | 113         |
| NWQL             | 90556 Thiobencarb-d10            | 91.6        | 105        | 114         |
| NWQL             | 90558 cis-Permethrin-13C6/is     | 42.4        | 76         | 120         |
| NWQL             | 90576 1-Bromo-3-chloropropane-d6 | 72.1        | 82.8       | 89.2        |
| NWQL             | 90607 Tetrahydrofuran-d8         | 43.5        | 77.6       | 113         |
| NWQL             | 90624 Butachlor SA               | 92          | 109        | 117         |
| NWQL             | 90625 Dimethachlor SA            | 96.6        | 112        | 123         |
| NWQL             | 90695 1,4-BrFbenzeneamb P&T      | 81.7        | 86         | 90.2        |
| NWQL             | 90696 Toluene-d8amb P&T          | 91.2        | 93.1       | 95.9        |
| NWQL             | 90701 1,4-BrFbenzeneheat P&T     | 93.5        | 101        | 109         |

| Analyzing Agency | Surrogate compound name             | Minimum (%) | Median (%) | Maximum (%) |
|------------------|-------------------------------------|-------------|------------|-------------|
| NWQL             | 90703 Toluene-d8heat P&T            | 93.2        | 96.8       | 102         |
| NWQL             | 90808 Diuron-d6                     | 91.3        | 97.4       | 117         |
| NWQL             | 91769 Thiabendazole-d4              | 61.1        | 84.8       | 92.1        |
| NWQL             | 91772 Albuterol-d9                  | 103         | 124        | 144         |
| NWQL             | 91773 Diltiazem-d3                  | 96.9        | 150        | 201         |
| NWQL             | 91774 Trimethoprim-d9               | 77.1        | 91.6       | 100         |
| NWQL             | 91775 Acetaminophen-d3              | 63.7        | 111        | 249         |
| NWQL             | 91776 Norfluoxetine-d6              | 65          | 92.5       | 105         |
| NWQL             | 91777 Methadone-d9                  | 113         | 177        | 223         |
| NWQL             | 91778 Oxycodone-d3                  | 95.7        | 119        | 137         |
| NWQL             | 91779 Hydrocodone-d3                | 103         | 111        | 121         |
| NWQL             | 91780 Temazepam-d5                  | 83.1        | 94         | 104         |
| NWQL             | 91781 Caffeine-(trimethyl-13C3)     | 82.3        | 98.8       | 118         |
| NWQL             | 91782 Sulfamethoxazole-(phenyl13C6) | 88.2        | 101        | 172         |
| NWQL             | 91783 Cotinine-d3rog                | 79.1        | 89.7       | 96.7        |
| NWQL             | 91784 Amphetamine-d6                | 80.4        | 104        | 112         |
| NWQL             | 91786 Codeine-d6                    | 81.1        | 112        | 134         |
| NWQL             | 91787 Pseudoephedrine-d3            | 80.1        | 101        | 109         |
| NWQL             | 91788 Diphenhydramine-d3            | 115         | 150        | 178         |
| NWQL             | 91789 Fluoxetine-d6                 | 67.7        | 133        | 182         |
| NWQL             | 91790 Diazepam-d5                   | 84.7        | 93         | 99.8        |
| NWQL             | 91986 2,4-D-d3                      | 83.3        | 93.2       | 101         |
| NWQL             | 99832 1,2-Dichloroethane-d4         | 97.8        | 104        | 112         |

Table S7. Mammalian Bioactivities in ng equivalents per liter (ng L-1) of standard steroid hormone (E2, DHT, DEX) analyzed in source water, finished water, and service-area tapwater samples collected in Minnesota, 2019. Quantifiable endocrine activities above and below MDC are shown in Bold and Italics fonts, respectively. Blue Font and "FB" Site ID suffix indicate a Field Blank. Quantifiable endocrine activity below MDC is italicized.

[DEX, dexamethasone; DHT, 4,5a-dihydrotestosterone; E2, 17b-estradiol; EC50, half maximum effect concentration in ng/L; MDC, Minimum Detectable Concentration in ng/L; NA, not applicable; ND, no endocrine activity detected compared to vehicle control treated cells.]

| Site Code              | Site type    | Source of water | E2        | DHT           | DEX       |
|------------------------|--------------|-----------------|-----------|---------------|-----------|
| MNTW2019 023           | Source       | Surface water   | 0.868     | <i>0.0665</i> | ND        |
| MNTW2019 022           | Finished     | Surface water   | ND        | ND            | ND        |
| MNTW2019 024           | Tap          | Surface water   | ND        | ND            | ND        |
| MNTW2019 025           | Tap          | Surface water   | ND        | ND            | ND        |
| MNTW2019 010           | Source       | Groundwater     | ND        | ND            | ND        |
| MNTW2019 009           | Finished     | Groundwater     | ND        | ND            | ND        |
| MNTW2019 007           | Tap          | Groundwater     | ND        | ND            | ND        |
| MNTW2019 008           | Tap          | Groundwater     | ND        | ND            | ND        |
| MNTW2019 027           | Source       | Groundwater     | ND        | ND            | ND        |
| MNTW2019 026           | Finished     | Groundwater     | ND        | ND            | ND        |
| MNTW2019 030           | Tap          | Groundwater     | ND        | ND            | ND        |
| MNTW2019 028           | Source       | Groundwater     | ND        | ND            | ND        |
| MNTW2019 029           | Finished     | Groundwater     | ND        | ND            | ND        |
| MNTW2019 031           | Tap          | Groundwater     | ND        | ND            | ND        |
| MNTW2019 037           | Source       | Groundwater     | ND        | ND            | ND        |
| MNTW2019 036           | Finished     | Groundwater     | ND        | ND            | ND        |
| MNTW2019 038           | Tap          | Groundwater     | ND        | ND            | ND        |
| MNTW2019 039           | Tap          | Groundwater     | ND        | ND            | ND        |
| <b>MNTW2019 039 FB</b> | <b>Blank</b> | <b>NA</b>       | <b>ND</b> | <b>ND</b>     | <b>ND</b> |
| MNTW2019 011           | Source       | Surface water   | 0.112     | ND            | ND        |
| MNTW2019 012           | Finished     | Surface water   | 0.210     | ND            | ND        |
| MNTW2019 014           | Tap          | Surface water   | ND        | ND            | ND        |
| MNTW2019 013           | Tap          | Surface water   | ND        | ND            | ND        |
| MNTW2019 020           | Source       | Groundwater     | ND        | ND            | ND        |
| MNTW2019 019           | Finished     | Groundwater     | ND        | ND            | ND        |
| MNTW2019 006           | Tap          | Groundwater     | ND        | ND            | ND        |
| MNTW2019 018           | Source       | Groundwater     | ND        | ND            | ND        |
| MNTW2019 017           | Finished     | Groundwater     | ND        | ND            | ND        |
| MNTW2019 021           | Tap          | Groundwater     | ND        | ND            | ND        |
| MNTW2019 002           | Source       | Groundwater     | ND        | ND            | ND        |
| MNTW2019 005           | Tap          | Groundwater     | ND        | ND            | ND        |
| <b>MNTW2019 005 FB</b> | <b>Blank</b> | <b>NA</b>       | <b>ND</b> | <b>ND</b>     | <b>ND</b> |
| MNTW2019 004           | Source       | Surface water   | 0.032     | ND            | ND        |
| MNTW2019 003           | Finished     | Surface water   | ND        | ND            | ND        |
| MNTW2019 001           | Tap          | Surface water   | ND        | ND            | ND        |

| Site Code                       | Site type    | Source of water | E2        | DHT       | DEX       |
|---------------------------------|--------------|-----------------|-----------|-----------|-----------|
| MNTW2019 016                    | Source       | Groundwater     | ND        | ND        | ND        |
| <b>MNTW2019 016</b>             | <b>Blank</b> | <b>NA</b>       | <b>ND</b> | <b>ND</b> | <b>ND</b> |
| MNTW2019 015                    | Tap          | Groundwater     | 0.028     | ND        | ND        |
| MNTW2019 033                    | Source       | Groundwater     | 0.028     | ND        | ND        |
| MNTW2019 032                    | Finished     | Groundwater     | ND        | ND        | ND        |
| MNTW2019 034                    | Tap          | Groundwater     | ND        | ND        | ND        |
| MNTW2019 035                    | Tap          | Groundwater     | ND        | ND        | ND        |
| <b>MNTW2019 035 FB</b>          | <b>Blank</b> | <b>NA</b>       | <b>ND</b> | <b>ND</b> | <b>ND</b> |
|                                 |              |                 |           |           |           |
| <b>MDC</b>                      |              |                 | 0.0280    | 0.7400    | 6.5900    |
| <b>Standard EC<sub>50</sub></b> |              |                 | 0.4620    | 4.9500    | 72.1000   |
| <b># greater than MDC</b>       |              |                 | 6         | 0         | 0         |

Table S8. Compound: endpoint combinations excluded from ToxCast evaluation due to unreliable concentration-response relationship and resulting lack of confidence in activity concentration at cutoff (ACC).

[CAS number, Chemical Abstract Services Registry Number; endpoint, ToxCast assay endpoint name (<https://www.epa.gov/chemical-research/toxicity-forecasting>)]

| CAS number  | endPoint                   |
|-------------|----------------------------|
| 84852-15-3  | NVS ENZ hPTEN              |
| 84-66-2     | NVS ENZ rMAOBP             |
| 486-56-6    | TOX21 p53 BLA p3 viability |
| 51218-45-2  | TOX21 p53 BLA p5 ratio     |
| 86-74-8     | TOX21 p53 BLA p3 ratio     |
| 115-86-6    | TOX21 p53 BLA p3 ratio     |
| 115-96-8    | TOX21 p53 BLA p3 ratio     |
| 206-44-0    | TOX21 p53 BLA p3 ratio     |
| 115-86-6    | NVS NR hPPARg              |
| 80-05-7     | CLD CYP1A1 6hr             |
| 80-05-7     | CLD CYP1A2 6hr             |
| 82657-04-3  | BSK 3C Vis down            |
| 82657-04-3  | TOX21 NFkB BLA agonist ch1 |
| 82657-04-3  | NVS NR hPR                 |
| 120068-37-3 | NVS NR hCAR Antagonist     |
| 60-51-5     | NVS NR bER                 |
| 13194-48-4  | NCCT QuantiLum inhib dn    |
| 161050-58-4 | ATG Myb CIS up             |
| 173584-44-6 | ATG HSE CIS up             |
| 30560-19-1  | BSK 3C SRB up              |
| 30560-19-1  | ATG M 19 TRANS dn          |

| <b>CAS number</b> | <b>endPoint</b>                           |
|-------------------|-------------------------------------------|
| 61949-77-7        | ATG CMV CIS dn                            |
| 94-74-6           | NVS NR hCAR Antagonist                    |
| 94-74-6           | NVS NR hPPARg                             |
| 51218-45-2        | TOX21 p53 BLA p5 ch2                      |
| 759-94-4          | ATG Xbp1 CIS dn                           |
| 759-94-4          | ATG MRE CIS dn                            |
| 759-94-4          | ATG HNF6 CIS dn                           |
| 759-94-4          | ATG GATA CIS dn                           |
| 759-94-4          | ATG Myb CIS dn                            |
| 759-94-4          | ATG PBREM CIS dn                          |
| 759-94-4          | TOX21 p53 BLA p3 viability                |
| 834-12-8          | TOX21 p53 BLA p4 ratio                    |
| 122836-35-5       | ATG TA CIS dn                             |
| 87674-68-8        | TOX21 p53 BLA p2 ch2                      |
| 87674-68-8        | TOX21 p53 BLA p2 ratio                    |
| 111991-09-4       | TOX21 AutoFluor HEK293 Media blue         |
| 51235-04-2        | TOX21 p53 BLA p5 ratio                    |
| 51235-04-2        | TOX21 p53 BLA p5 ch1                      |
| 51235-04-2        | TOX21 p53 BLA p5 viability                |
| 51218-45-2        | TOX21 AR LUC MDAKB2 Agonist               |
| 51218-45-2        | TOX21 AR LUC MDAKB2 Agonist Counterscreen |
| 51218-45-2        | TOX21 p53 BLA p5 ratio                    |
| 75-05-8           | TOX21 TSHR Agonist ratio                  |
| 75-05-8           | TOX21 TSHR wt ratio                       |
| 75-05-8           | TOX21 TSHR HTRF Agonist ch1               |
| 1912-24-9         | BSK KF3CT IP10 up                         |
| 75-25-2           | TOX21 AR LUC MDAKB2 Agonist Counterscreen |
| 122-34-9          | APR HepG2 CellCycleArrest 1h up           |
| 124-48-1          | TOX21_RT_HEK293_FLO_32hr_viability        |



Table S10. Site-specific Exposure Activity Ratios (EAR) for all bioassay endpoints within each class shown. Data are for those compounds with exact Chemical Abstract Service (CAS) number matches and with reliable concentration-response relationship and ACC data in ToxCast, Minnesota Tapwater Exposure Study 2019.

[blank cells indicate chemical not detected or EAR (or SEAR) < 0.00001. Of 88 detected organics, 44 had reliable ACC data in ToxCast and EAR ≥0.00001. Red and orange fonts indicate exceedance of presumptive effects threshold (1) and precautionary screening level of concern (0.001), respectively.]

| Site Name    | Site Type | Source of Water | Cell Cycle | Nuclear Receptor | DNA Binding | Lyase   | Ion Channel | GPCR    | CYP     | Phosphatase | Esterase | Oxidoreductase | Steroid Hormone | Zebrafish | Malformation | Cell Morphology | Transporter | Kinase  | Protease | ΣEAR |         |
|--------------|-----------|-----------------|------------|------------------|-------------|---------|-------------|---------|---------|-------------|----------|----------------|-----------------|-----------|--------------|-----------------|-------------|---------|----------|------|---------|
| MNTW2019 023 | Source    | SW              | 1.65316    | 0.00127          | 0.00385     | 0.00336 | -           | -       | -       | -           | -        | -              | -               | -         | -            | -               | -           | -       | -        | -    | 1.66164 |
| MNTW2019 022 | Finished  | SW              | 1.15540    | 0.08690          | 0.00222     | 0.00128 | -           | -       | -       | -           | -        | -              | -               | -         | -            | -               | -           | -       | -        | -    | 1.24581 |
| MNTW2019 025 | Tap       | SW              | 1.14777    | 0.46624          | 0.00264     | 0.00107 | -           | -       | -       | -           | -        | -              | -               | -         | -            | -               | -           | -       | -        | -    | 1.61772 |
| MNTW2019 024 | Tap       | SW              | 1.02483    | 0.00088          | 0.00163     | 0.00102 | -           | -       | -       | -           | -        | -              | -               | -         | -            | -               | -           | -       | -        | -    | 1.02835 |
| MNTW2019 010 | Source    | GW              | 0.98341    | 0.00092          | 0.00148     | 0.00055 | -           | -       | -       | -           | -        | -              | -               | -         | -            | -               | -           | -       | -        | -    | 0.98636 |
| MNTW2019 009 | Finished  | GW              | 0.90122    | 0.42422          | 0.00160     | 0.00028 | -           | -       | -       | -           | -        | 0.00003        | 0.00002         | -         | -            | -               | -           | -       | -        | -    | 1.32737 |
| MNTW2019 007 | Tap       | GW              | 0.73628    | 0.00060          | 0.00149     | 0.00091 | -           | -       | 0.00056 | -           | -        | 0.00019        | 0.00015         | 0.00006   | -            | -               | -           | -       | -        | -    | 0.74024 |
| MNTW2019 008 | Tap       | GW              | 0.57375    | 0.00048          | 0.00099     | 0.00051 | -           | 0.00097 | 0.00060 | -           | -        | 0.00013        | 0.00011         | 0.00002   | -            | -               | -           | -       | -        | -    | 0.57757 |
| MNTW2019 027 | Source    | GW              | 0.51220    | 0.00047          | 0.00090     | 0.00063 | -           | -       | 0.00070 | 0.00012     | 0.00001  | 0.00018        | 0.00014         | 0.00003   | -            | -               | -           | -       | -        | -    | 0.51537 |
| MNTW2019 026 | Finished  | GW              | 0.49779    | 0.00043          | 0.00109     | 0.00063 | -           | -       | 0.00002 | -           | -        | 0.00009        | 0.00006         | 0.00001   | -            | -               | -           | -       | -        | -    | 0.50013 |
| MNTW2019 030 | Tap       | GW              | 0.45103    | 0.00032          | 0.00097     | 0.00063 | -           | -       | 0.00100 | -           | -        | 0.00016        | 0.00013         | 0.00002   | -            | -               | -           | -       | -        | -    | 0.45426 |
| MNTW2019 028 | Source    | GW              | 0.29097    | 0.07250          | 0.00127     | 0.00095 | -           | -       | 0.00045 | 0.00002     | 0.00002  | 0.00029        | 0.00022         | 0.00011   | -            | -               | -           | -       | -        | -    | 0.36680 |
| MNTW2019 029 | Finished  | GW              | 0.21356    | 0.00017          | 0.00165     | 0.00148 | -           | -       | 0.00023 | 0.00002     | 0.00004  | 0.00012        | 0.00009         | 0.00002   | -            | -               | -           | -       | 0.00001  | -    | 0.21739 |
| MNTW2019 031 | Tap       | GW              | 0.21158    | 0.00036          | 0.00097     | 0.00016 | -           | -       | 0.00008 | 0.00003     | 0.00003  | 0.00029        | 0.00022         | 0.00015   | -            | -               | -           | -       | 0.00001  | -    | 0.21390 |
| MNTW2019 037 | Source    | GW              | 0.14396    | 0.02845          | 0.00053     | 0.00057 | -           | 0.00101 | -       | -           | -        | -              | -               | -         | -            | -               | -           | -       | -        | -    | 0.17452 |
| MNTW2019 036 | Finished  | GW              | 0.09532    | -                | 0.00291     | 0.00409 | -           | -       | -       | -           | -        | -              | -               | -         | -            | -               | -           | -       | -        | -    | 0.10233 |
| MNTW2019 038 | Tap       | GW              | 0.09293    | -                | 0.00604     | 0.00703 | -           | -       | 0.00008 | 0.00011     | 0.00001  | 0.00032        | 0.00023         | 0.00007   | -            | 0.00001         | -           | -       | -        | -    | 0.10684 |
| MNTW2019 039 | Tap       | GW              | 0.08650    | -                | 0.00356     | 0.00498 | -           | -       | -       | -           | -        | -              | -               | -         | -            | -               | -           | -       | -        | -    | 0.09503 |
| MNTW2019 011 | Source    | SW              | 0.08208    | 0.04162          | 0.00019     | 0.00022 | -           | -       | -       | -           | -        | -              | -               | -         | -            | -               | -           | -       | -        | -    | 0.12412 |
| MNTW2019 012 | Finished  | SW              | 0.06902    | 0.00002          | 0.00919     | 0.00786 | 0.00076     | -       | 0.00037 | 0.00016     | 0.00002  | 0.00031        | 0.00022         | 0.00007   | -            | 0.00001         | 0.00003     | -       | -        | -    | 0.08803 |
| MNTW2019 013 | Tap       | SW              | 0.06551    | 0.03780          | 0.00037     | 0.00065 | -           | -       | 0.00002 | 0.00012     | -        | -              | -               | 0.00003   | -            | -               | -           | -       | -        | -    | 0.10451 |
| MNTW2019 014 | Tap       | SW              | 0.06514    | -                | 0.00283     | 0.00400 | -           | -       | -       | -           | -        | -              | -               | -         | -            | -               | -           | -       | -        | -    | 0.07197 |
| MNTW2019 020 | Source    | GW              | 0.02498    | 0.13791          | 0.00122     | 0.00015 | -           | -       | 0.00043 | 0.00002     | 0.00003  | 0.00032        | 0.00024         | 0.00013   | 0.00001      | -               | -           | -       | 0.00001  | -    | 0.16544 |
| MNTW2019 019 | Finished  | GW              | 0.02107    | 0.04362          | 0.03357     | 0.03084 | 0.00100     | 0.00126 | 0.00044 | 0.00058     | 0.00037  | 0.00021        | 0.00016         | 0.00003   | 0.00012      | 0.00006         | 0.00005     | 0.00002 | -        | -    | 0.13340 |
| MNTW2019 006 | Tap       | GW              | 0.00575    | 0.00002          | 0.00044     | 0.00050 | -           | -       | 0.00001 | 0.00035     | 0.00002  | -              | 0.00001         | 0.00009   | 0.00002      | -               | -           | -       | -        | -    | 0.00722 |
| MNTW2019 018 | Source    | GW              | 0.00567    | -                | 0.00039     | 0.00017 | -           | -       | 0.00033 | 0.00009     | 0.00004  | 0.00031        | 0.00024         | 0.00014   | -            | -               | -           | -       | 0.00001  | -    | 0.00737 |
| MNTW2019 017 | Finished  | GW              | 0.00498    | 0.15674          | 0.00148     | 0.00015 | -           | -       | 0.00037 | 0.00003     | 0.00003  | 0.00035        | 0.00025         | 0.00014   | 0.00002      | -               | -           | -       | 0.00001  | -    | 0.16453 |
| MNTW2019 021 | Tap       | GW              | 0.00394    | 0.12653          | 0.00121     | 0.00122 | -           | -       | 0.00052 | 0.00001     | -        | 0.00032        | 0.00023         | 0.00011   | 0.00002      | -               | -           | -       | -        | -    | 0.13412 |
| MNTW2019 002 | Source    | GW              | 0.00209    | 0.00003          | 0.00746     | 0.00533 | 0.00134     | -       | 0.00009 | 0.00029     | 0.00009  | 0.00033        | 0.00024         | 0.00007   | 0.00003      | 0.00004         | 0.00006     | -       | -        | -    | 0.01751 |
| MNTW2019 005 | Tap       | GW              | 0.00112    | -                | 0.00014     | 0.00002 | -           | -       | -       | 0.00001     | 0.00002  | 0.00005        | 0.00004         | 0.00003   | -            | -               | -           | -       | -        | -    | 0.00141 |
| MNTW2019 004 | Source    | SW              | 0.00076    | -                | 0.00033     | 0.00050 | -           | -       | -       | -           | -        | -              | -               | -         | -            | -               | -           | -       | -        | -    | 0.00159 |
| MNTW2019 003 | Finished  | SW              | 0.00040    | -                | 0.00043     | 0.00039 | -           | -       | 0.00006 | 0.00006     | 0.00002  | 0.00014        | 0.00010         | 0.00002   | -            | -               | -           | -       | 0.00001  | -    | 0.00164 |
| MNTW2019 001 | Tap       | SW              | 0.00003    | 0.00001          | 0.00022     | 0.00010 | -           | -       | 0.00108 | -           | -        | 0.00015        | 0.00012         | 0.00002   | -            | -               | -           | -       | -        | -    | 0.00175 |
| MNTW2019 016 | Source    | GW              | -          | -                | 0.00021     | 0.00005 | -           | -       | 0.00034 | 0.00001     | 0.00003  | 0.00013        | 0.00010         | 0.00002   | -            | -               | -           | -       | 0.00001  | -    | 0.00091 |
| MNTW2019 015 | Tap       | GW              | -          | 0.05858          | 0.00002     | 0.00004 | -           | -       | -       | -           | 0.00002  | -              | -               | -         | -            | -               | -           | -       | -        | -    | 0.05866 |
| MNTW2019 033 | Source    | GW              | -          | -                | 0.00001     | -       | -           | -       | -       | -           | 0.00001  | -              | -               | -         | -            | -               | -           | -       | -        | -    | 0.00003 |
| MNTW2019 032 | Finished  | GW              | -          | -                | 0.00002     | -       | -           | -       | -       | -           | -        | -              | -               | -         | -            | -               | -           | -       | -        | -    | 0.00002 |
| MNTW2019 034 | Tap       | GW              | -          | -                | 0.00002     | 0.00016 | -           | -       | -       | 0.00007     | -        | -              | -               | -         | -            | -               | -           | -       | -        | -    | 0.00025 |
| MNTW2019 035 | Tap       | GW              | -          | 0.00001          | 0.00018     | 0.00178 | -           | -       | 0.00099 | 0.00074     | -        | 0.00021        | 0.00015         | 0.00003   | -            | -               | -           | -       | -        | -    | 0.00409 |





Table S12. Human-health-based benchmarks in microgram/L ( $\mu\text{g/L}$ ) used to create toxicity quotient results in Table S11.

[AAP, American Academy of Pediatrics; DWEL, Drinking Water Lifetime Exposure Level; DWHA (OH), Ohio State Drinking Water Health Advisory; HBSL, Health Based Screening Level; HHBP, Human Health Benchmark Pesticide; HRL (MN), Minnesota State Health Risk Level MCL, National Primary Drinking Water Regulation Maximum Contaminant Level; MCL (NY), New York State Maximum Contaminant Level; MCL (MI), Michigan State Maximum Contaminant Level; MCL (NH) New Hampshire Proposed State Maximum Contaminant Level; MCLG, National Primary Drinking Water Regulation Maximum Contaminant Level Goal; MCLG (RL), Reporting Limit (from Table S2) was used in place of an MCLG of zero; Tier 1 PCL (TX), Texas State Tier 1 Protection Concentration Levels; WHO, World Health Organization Drinking Water Guideline. Organoleptic standards not based on human-health concerns; like National Secondary Drinking Water Standards for Al, Cl, Fe, Mn, SO<sub>4</sub>, Zn; not included. Total Chromium and chromium (IV) have the same WHO Drinking-water standard; only Total Chromium used for TQ analyses. Compounds with an MCLG of 'zero' were set to the laboratory reporting limit (except Pb, which is evaluated against the American Academy of Pediatrics limit of 1.0  $\mu\text{g/L}$ ): Trichloroethene, Bromodichloromethane, Tribromomethane, Dichloromethane, Benzene, Tetrachloroethene.]

| CAS         | Chemical                 | Value | Type                       |
|-------------|--------------------------|-------|----------------------------|
| 71-55-6     | 1,1,1-Trichloroethane    | 200   | <a href="#">MCL</a>        |
| 71-55-6     | 1,1,1-Trichloroethane    | 1000  | <a href="#">DWEL</a>       |
| 75-34-3     | 1,1-Dichloro-2-propanone | 80    | <a href="#">RAA16 (MN)</a> |
| 75-35-4     | 1,1-Dichloroethane       | 20    | <a href="#">RAA17 (MN)</a> |
| 94-75-7     | 2,4-D                    | 70    | <a href="#">MCL</a>        |
| 171262-17-2 | Alachlor oxanilic acid   | 50    | <a href="#">RAA16 (MN)</a> |
| 7440-38-2   | Arsenic                  | 0.02  | <a href="#">MCLG (RL)</a>  |
| 1912-24-9   | Atrazine                 | 3     | <a href="#">MCLG</a>       |
| 7440-39-3   | Barium                   | 1300  | <a href="#">WHO</a>        |
| 25057-89-0  | Bentazon                 | 890   | <a href="#">HHBP</a>       |
| 71-43-2     | Benzene                  | 0.026 | <a href="#">MCLG (RL)</a>  |
| 7440-42-8   | Boron                    | 500   | <a href="#">RAA17 (MN)</a> |
| 314-40-9    | Bromacil                 | 5000  | <a href="#">DWEL</a>       |
| 75-27-4     | Bromodichloromethane     | 0.05  | <a href="#">MCLG (RL)</a>  |
| 7440-43-9   | Cadmium                  | 0.5   | <a href="#">HRL15 (MN)</a> |
| 7440-47-3   | Chromium                 | 50    | <a href="#">WHO</a>        |
| 156-59-2    | cis-1,2-Dichloroethene   | 70    | <a href="#">MCLG</a>       |
| 7440-50-8   | Copper                   | 1300  | <a href="#">MCL</a>        |
| 35045-02-4  | Desamino metribuzin      | 10    | <a href="#">RAA12 (MN)</a> |
| 93413-62-8  | Desvenlafaxine           | 20    | <a href="#">HBV15 (MN)</a> |
| 124-48-1    | Dibromochloromethane     | 60    | <a href="#">MCLG</a>       |
| 75-09-2     | Dichloromethane          | 0.04  | <a href="#">MCLG (RL)</a>  |
| 87674-68-8  | Dimethenamid             | 40    | <a href="#">HBSL</a>       |
| 100-41-4    | Ethylbenzene             | 700   | <a href="#">MCLG</a>       |
| 16984-48-8  | Fluoride                 | 4000  | <a href="#">MCLG</a>       |

| CAS         | Chemical                             | Value    | Type                             |
|-------------|--------------------------------------|----------|----------------------------------|
| 75-43-4     | Dichlorofluoromethane                | 20       | <a href="#">RAA17 (MN)</a>       |
| 7439-92-1   | Lead                                 | 1        | <a href="#">AAP</a>              |
| 7439-96-5   | Manganese                            | 100      | <a href="#">HBV18 (MN)</a>       |
| 57837-19-1  | Metalaxyl                            | 500      | <a href="#">HBSL</a>             |
| 29385-43-1  | Methylbenzotriazole                  | 20       | <a href="#">RAA19 (MN)</a>       |
| 51218-45-2  | Metolachlor                          | 600      | <a href="#">HBSL</a>             |
| 152019-73-3 | Metolachlor oxanilic acid            | 1000     | <a href="#">HVB18 (MN)</a>       |
| 171118-09-5 | Metolachlor sulfonic acid            | 1000     | <a href="#">HVB18 (MN)</a>       |
| 1634-04-4   | Methyl tert-butyl ether              | 700      | <a href="#">RAA13 (MN)</a>       |
| 7439-98-7   | Molybdenum                           | 30       | <a href="#">HBSL</a>             |
| 179601-23-1 | m-Xylene plus p-xylene               | 10000    | <a href="#">MCL</a>              |
| 7440-02-0   | Nickel                               | 100      | <a href="#">HRL93 (MN)</a>       |
| 14797-55-8  | Nitrate                              | 10000    | <a href="#">MCLG</a>             |
| 2163-68-0   | OIET                                 | 60       | <a href="#">HHBP</a>             |
| 95-47-6     | o-Xylene                             | 10000    | <a href="#">MCL</a>              |
| 375-95-1    | Perfluorononanoic acid (PFNA)        | 0.006    | <a href="#">MCL (MI)</a>         |
| 1763-23-1   | Perfluorooctanesulfonic acid (PFOS)  | 0.00002  | <a href="#">EPA HA</a>           |
| 335-67-1    | Perfluorooctanoic acid (PFOA)        | 0.000004 | <a href="#">EPA HA</a>           |
| 375-73-5    | Perfluorobutanesulfonic acid (PFBS)  | 2        | <a href="#">EPA HA</a>           |
| 375-22-4    | Perfluorobutanoic acid (PFBA)        | 7        | <a href="#">HRL-chronic (MN)</a> |
| 355-46-4    | Perfluorohexanesulfonic acid (PFHxS) | 0.018    | <a href="#">MCL (NH)</a>         |
| 2706-90-3   | Perfluoropentanoic acid (PFPeA)      | 0.093    | <a href="#">Tier 1 PCL (TX)</a>  |
| 1610-18-0   | Prometon                             | 500      | <a href="#">DWEL</a>             |
| 139-40-2    | Propazine                            | 700      | <a href="#">DWEL</a>             |
| 122-34-9    | Simazine                             | 4        | <a href="#">MCL</a>              |
| 7440-24-6   | Strontium                            | 3000     | <a href="#">RAA19 (MN)</a>       |
| 100-42-5    | Styrene                              | 100      | <a href="#">MCL</a>              |
| 723-46-6    | Sulfamethoxazole                     | 100      | <a href="#">RAA13 (MN)</a>       |
| 34014-18-1  | Tebuthiuron                          | 900      | <a href="#">HBSL</a>             |
| 5915-41-3   | Terbuthylazine                       | 2        | <a href="#">HBSL</a>             |
| 127-18-4    | Tetrachloroethene                    | 0.058    | <a href="#">MCLG (RL)</a>        |
| 56-23-5     | Tetrachloromethane                   | 0.06     | <a href="#">MCLG (RL)</a>        |
| 156-60-5    | trans-1,2-Dichloroethene             | 100      | <a href="#">MCL</a>              |
| 75-25-2     | Tribromomethane                      | 0.05     | <a href="#">MCLG (RL)</a>        |
| 79-01-6     | Trichloroethene                      | 0.025    | <a href="#">MCLG (RL)</a>        |
| 67-66-3     | Trichloromethane                     | 70       | <a href="#">MCLG</a>             |
| 7440-61-1   | Uranium                              | 0.1      | <a href="#">MCLG (RL)</a>        |
| 7440-66-6   | Zinc                                 | 2000     | <a href="#">HRL94</a>            |
| 35523-89-8  | Saxatoxins                           | 0.3      | <a href="#">DWHA (OH)</a>        |
| 101043-37-2 | Microcystins                         | 0.3      | <a href="#">DWHA (OH)</a>        |
| 7782-49-2   | Selenium                             | 30       | <a href="#">HRL93 (MN)</a>       |
